# Supplementary material
Source: PubMed Central journal article supplement (PMC3372267)
Supplement: supp_32.12.2170_MCB-MCB00010-12-s01.pdf [file supp_32.12.2170_MCB-MCB00010-12-s01.pdf]

## **SUPPLEMENTARY METHODS**

### ***Drosophila* embryo chromatin preparation**

For chromatin preparation from *Drosophila* embryos, 0-24hr-old embryos were collected from population cages, dechorionated in 50% bleach for 90 seconds, washed with running water and transferred into Falcon tubes, 1.5g dry embryos/50ml PBS-0.1% Tween-20 (PBST). Let embryos settle for 5 minutes and removed supernatant. Embryos were first cross-linked with 10ml of 1.8% Formaldehyde in PBST, 30ml n-Heptane, for 15 minutes, shaking vigorously at RT. Pelleted embryos 1 minute at 500g, RT; removed supernatant and washed twice with PBST; resuspended embryos in 10ml PBST and homogenized with 10 strokes from a tight-fitting pestle to release the nuclei; centrifuged 1 minute, 400g, and collected supernatant into a new tube; centrifuged 10 minutes, 1100g, and discarded supernatant. Cross-linked nuclei with 10ml of 3% Formaldehyde in PBST, at RT, 30 minutes. Washed the Chromatin 5 times with PBST.

### **GO term analysis**

GO Term analysis was performed on the FuncAssociate software (S1), using the web interface. The following lists of proteins were used as input to calculate GO term enrichments: 1) all the proteins identified in both TAS purifications from both cell lines (and that were not present in the negative control or “common contaminants” list, and that were identified through more than 1 peptide); 2) all the proteins identified associated with TAS-R (same filters); 3) proteins associated exclusively with TAS-R (same filters); 4) all the proteins associated with TAS-L (same filters); and 5) proteins

associated exclusively with TAS-L (same filters, except for the “1 peptide” filter, because the number of exclusive TAS-L factors was too low to analyze GO term enrichment otherwise).

### **Capture probe design**

Oligo selection is done with the help of the Exiqon oligo tools found at <http://www.exiqon.com/oligo-tools>. Oligos are selected on the basis of their T<sub>m</sub> (usually higher than 78C), the lowest possible self-annealing propensity, and the least homology to non-target regions in the genome, as determined by BLAST. No thresholds for self-hybridization and BLAST complementarity have been determined. Rather, for the locus of interest, we look for the region within this locus where these parameters are most favorable. This was done empirically. LNA-C bases were not included in the design of capture probes for several reasons: the difficulty in solubilizing the lyophilized reagent; the limitation of the synthesizer to hold 9 reagent bottles, making it possible to do the synthesis in one step when we exclude one of the LNA bases; the active search for regions in the target with a predominance of G over C (on one or the other strand), so that the self-annealing energies would be reduced; and the empirical evidence that capture probes with LNA-G work better than capture probes with LNA-C (when using the exact same target, with complementary capture probes targeting one or the other strand). The capture probe spacer is similar, but not identical to the design previously reported (11). The original protocol used a custom-made 108-atom spacer; for this work, we used commercially available phosphoramidite spacer-18 monomers (4 units),

plus the DesthiobiotinTEG phosphoramidite (Glen Research), bringing the total spacer length close to 100 atoms (comparable with the 108 atom length previously reported). We tested possible probe designs for their ability to enrich before arriving at the design described above. After showing that this design worked for TAS-R, we designed three other probes for this same region with similar success in enrichment. Each of these TAS-R probes hybridized to sequences that clustered with the TAS-R region in a manner similar to the arrangement of clustered sequences that hybridize to the probe presented in the Results. The TAS-L oligo was the only one tested for the TAS-L region.

A detailed capture probe synthesis protocol can be found at <http://tiny.cc/h9356>

**SUPPLEMENTARY TABLES**

**Table S1:** Total peptides identified in PICh experiments

| Flybase ID                                               | Name                | Kc        |        |          |        |          |        | S3        |        |          |        |          |        |
|----------------------------------------------------------|---------------------|-----------|--------|----------|--------|----------|--------|-----------|--------|----------|--------|----------|--------|
|                                                          |                     | Scrambled |        | TAS-L    |        | TAS-R    |        | Scrambled |        | TAS-L    |        | TAS-R    |        |
|                                                          |                     | peptides  |        | peptides |        | peptides |        | peptides  |        | peptides |        | peptides |        |
|                                                          |                     | total     | unique | total    | unique | total    | unique | total     | unique | total    | unique | total    | unique |
| <b>Proteins identified in the Scramble purifications</b> |                     |           |        |          |        |          |        |           |        |          |        |          |        |
| FBgn0003732                                              | <b>Top2</b>         | 7         | 5      | 25       | 19     | 99       | 54     | 29        | 26     | 56       | 26     | 132      | 59     |
| FBgn0051611                                              | <b>Histone H4</b>   | 14        | 8      | 41       | 13     | 35       | 10     | 17        | 8      | 28       | 9      | 32       | 9      |
| FBgn0027580                                              | <b>CG1516</b>       | 19        | 12     | 0        | 0      | 1        | 1      | 9         | 7      | 3        | 3      | 7        | 7      |
| FBgn0010173                                              | <b>RpA-70</b>       | 13        | 9      | 13       | 6      | 47       | 22     | 9         | 7      | 13       | 6      | 41       | 20     |
| FBgn0061209                                              | <b>Histone H2B</b>  | 6         | 4      | 28       | 8      | 27       | 8      | 14        | 8      | 21       | 8      | 23       | 7      |
| FBgn0000556                                              | <b>Ef1α48D</b>      | 7         | 3      | 28       | 12     | 37       | 12     | 10        | 5      | 28       | 13     | 36       | 13     |
| FBgn0002183                                              | <b>dre4</b>         | 7         | 5      | 22       | 13     | 48       | 29     | 9         | 9      | 36       | 17     | 49       | 26     |
| FBgn0000047                                              | <b>Act88F</b>       | 4         | 3      | 8        | 6      | 20       | 6      | 10        | 8      | 7        | 4      | 20       | 14     |
| FBgn0001197                                              | <b>Histone H2Av</b> | 5         | 2      | 9        | 2      | 12       | 2      | 5         | 2      | 8        | 2      | 11       | 3      |
| FBgn0034962                                              | <b>Histone H1</b>   | 3         | 3      | 19       | 10     | 15       | 9      | 4         | 4      | 11       | 6      | 9        | 9      |
| FBgn0034961                                              | <b>Histone H3</b>   | 1         | 1      | 8        | 3      | 15       | 5      | 5         | 4      | 17       | 5      | 15       | 4      |
| FBgn0014965                                              | <b>gypsyI gag</b>   | 0         | 0      | 0        | 0      | 0        | 0      | 6         | 5      | 17       | 6      | 17       | 6      |
| FBgn0002525                                              | <b>Lam</b>          | 2         | 2      | 6        | 5      | 23       | 12     | 3         | 3      | 4        | 3      | 22       | 13     |
| FBgn0003022                                              | <b>Ote</b>          | 1         | 1      | 4        | 4      | 12       | 12     | 4         | 3      | 10       | 8      | 12       | 6      |
| FBgn0033998                                              | <b>row</b>          | 2         | 2      | 5        | 5      | 20       | 15     | 2         | 2      | 4        | 3      | 15       | 8      |
| FBgn0001219                                              | <b>Hsc70-4</b>      | 3         | 2      | 23       | 15     | 33       | 17     | 1         | 1      | 11       | 6      | 12       | 6      |
| FBgn0032244                                              | <b>RfC3</b>         | 0         | 0      | 1        | 1      | 5        | 5      | 4         | 4      | 3        | 3      | 2        | 2      |
| FBgn0004913                                              | <b>Gnf1</b>         | 0         | 0      | 3        | 3      | 19       | 15     | 3         | 3      | 9        | 8      | 29       | 17     |
| FBgn0032050                                              | <b>CG13096</b>      | 3         | 3      | 5        | 3      | 10       | 6      | 0         | 0      | 3        | 2      | 3        | 3      |
| FBgn0001226                                              | <b>Hsp27</b>        | 0         | 0      | 0        | 0      | 0        | 0      | 2         | 2      | 3        | 3      | 6        | 5      |
| FBgn0001220                                              | <b>Hsc70-5</b>      | 2         | 2      | 3        | 2      | 3        | 2      | 0         | 0      | 0        | 0      | 0        | 0      |
| FBgn0003459                                              | <b>stwl</b>         | 1         | 1      | 1        | 1      | 2        | 1      | 1         | 1      | 2        | 1      | 3        | 2      |
| FBgn0010278                                              | <b>Ssrp</b>         | 1         | 1      | 18       | 12     | 29       | 17     | 1         | 1      | 11       | 7      | 26       | 14     |
| FBgn0033879                                              | <b>CG6543</b>       | 1         | 1      | 2        | 2      | 2        | 2      | 1         | 1      | 1        | 1      | 1        | 1      |
| FBgn0003607                                              | <b>Su(var)205</b>   | 1         | 1      | 35       | 18     | 22       | 13     | 1         | 1      | 19       | 12     | 6        | 6      |
| FBgn0259937                                              | <b>Nop60B</b>       | 2         | 2      | 1        | 1      | 1        | 1      | 0         | 0      | 0        | 0      | 0        | 0      |
| FBgn0010438                                              | <b>mtSSB</b>        | 2         | 2      | 1        | 1      | 3        | 3      | 0         | 0      | 0        | 0      | 3        | 3      |
| FBgn0037137                                              | <b>Nopp140</b>      | 2         | 1      | 1        | 1      | 3        | 2      | 0         | 0      | 0        | 0      | 0        | 0      |
| FBgn0020496                                              | <b>CtBP</b>         | 0         | 0      | 12       | 8      | 12       | 8      | 2         | 2      | 0        | 0      | 3        | 1      |
| FBgn0024271                                              | <b>ZAM\gag</b>      | 2         | 2      | 3        | 1      | 6        | 4      | 0         | 0      | 2        | 2      | 0        | 0      |

|                                                                 |                     |   |   |   |   |    |   |   |   |   |   |    |   |
|-----------------------------------------------------------------|---------------------|---|---|---|---|----|---|---|---|---|---|----|---|
| FBgn0040266                                                     | <b>Transpac\gag</b> | 0 | 0 | 0 | 0 | 0  | 0 | 2 | 2 | 8 | 7 | 4  | 4 |
| FBgn0000043                                                     | <b>Act42A</b>       | 1 | 1 | 2 | 2 | 1  | 1 | 0 | 0 | 2 | 1 | 4  | 4 |
| FBgn0001091                                                     | <b>Gapdh1</b>       | 0 | 0 | 0 | 0 | 0  | 0 | 1 | 1 | 0 | 0 | 0  | 0 |
| FBgn0004907                                                     | <b>14-3-3ζ</b>      | 0 | 0 | 2 | 2 | 2  | 2 | 1 | 1 | 0 | 0 | 0  | 0 |
| FBgn0013275                                                     | <b>Hsp70Aa</b>      | 0 | 0 | 0 | 0 | 1  | 1 | 1 | 1 | 0 | 0 | 0  | 0 |
| FBgn0026761                                                     | <b>Trap1</b>        | 0 | 0 | 1 | 1 | 2  | 1 | 1 | 1 | 0 | 0 | 0  | 0 |
| FBgn0004867                                                     | <b>RpS2</b>         | 1 | 1 | 1 | 1 | 1  | 1 | 0 | 0 | 0 | 0 | 0  | 0 |
| FBgn0004924                                                     | <b>Top1</b>         | 1 | 1 | 0 | 0 | 3  | 2 | 0 | 0 | 0 | 0 | 2  | 2 |
| FBgn0004237                                                     | <b>Hrb87F</b>       | 0 | 0 | 1 | 1 | 0  | 0 | 1 | 1 | 2 | 1 | 2  | 1 |
| FBgn0050122                                                     | <b>CG30122</b>      | 0 | 0 | 0 | 0 | 1  | 1 | 1 | 1 | 0 | 0 | 3  | 2 |
| FBgn0004795                                                     | <b>retn</b>         | 1 | 1 | 0 | 0 | 1  | 1 | 0 | 0 | 0 | 0 | 3  | 1 |
| FBgn0013269                                                     | <b>FK506-bp1</b>    | 0 | 0 | 4 | 4 | 4  | 4 | 1 | 1 | 9 | 7 | 3  | 3 |
| FBgn0040284                                                     | <b>SF2</b>          | 0 | 0 | 0 | 0 | 2  | 2 | 1 | 1 | 0 | 0 | 1  | 1 |
| FBgn0003062                                                     | <b>Fib</b>          | 1 | 1 | 3 | 3 | 5  | 5 | 0 | 0 | 2 | 2 | 2  | 2 |
| FBgn0034528                                                     | <b>CG11180</b>      | 1 | 1 | 0 | 0 | 0  | 0 | 0 | 0 | 0 | 0 | 0  | 0 |
| FBgn0011764                                                     | <b>Dsp1</b>         | 1 | 1 | 1 | 1 | 3  | 1 | 0 | 0 | 2 | 1 | 1  | 1 |
| FBgn0035674                                                     | <b>CG13295</b>      | 1 | 1 | 0 | 0 | 0  | 0 | 0 | 0 | 0 | 0 | 0  | 0 |
| FBgn0260985                                                     | <b>RfC4</b>         | 0 | 0 | 2 | 2 | 4  | 4 | 1 | 1 | 1 | 1 | 5  | 4 |
| FBgn0030362                                                     | <b>Regucalcin</b>   | 0 | 0 | 0 | 0 | 0  | 0 | 1 | 1 | 1 | 1 | 4  | 4 |
| FBgn0010417                                                     | <b>Taf6</b>         | 1 | 1 | 0 | 0 | 0  | 0 | 0 | 0 | 0 | 0 | 0  | 0 |
| FBgn0040345                                                     | <b>CG3708</b>       | 1 | 1 | 0 | 0 | 0  | 0 | 0 | 0 | 0 | 0 | 0  | 0 |
| FBgn0010328                                                     | <b>woc</b>          | 1 | 1 | 0 | 0 | 14 | 8 | 0 | 0 | 4 | 3 | 10 | 8 |
| FBgn0027889                                                     | <b>ball</b>         | 0 | 0 | 1 | 1 | 8  | 7 | 1 | 1 | 2 | 2 | 0  | 0 |
| FBgn0030871                                                     | <b>CG8142</b>       | 0 | 0 | 0 | 0 | 2  | 2 | 1 | 1 | 0 | 0 | 2  | 2 |
| <b>Proteins identified as non-specific in Rees et al (2011)</b> |                     |   |   |   |   |    |   |   |   |   |   |    |   |
| FBgn0010397                                                     | <b>LamC</b>         | 0 | 0 | 0 | 0 | 1  | 1 | 0 | 0 | 0 | 0 | 0  | 0 |
| FBgn0027783                                                     | <b>SMC2</b>         | 0 | 0 | 0 | 0 | 1  | 1 | 0 | 0 | 0 | 0 | 0  | 0 |
| FBgn0035630                                                     | <b>CG10576</b>      | 0 | 0 | 0 | 0 | 1  | 1 | 0 | 0 | 0 | 0 | 0  | 0 |
| FBgn0011661                                                     | <b>Moe</b>          | 0 | 0 | 2 | 2 | 0  | 0 | 0 | 0 | 0 | 0 | 2  | 2 |
| FBgn0033636                                                     | <b>tou</b>          | 0 | 0 | 0 | 0 | 2  | 2 | 0 | 0 | 0 | 0 | 0  | 0 |
| FBgn0010217                                                     | <b>ATPsyn-β</b>     | 0 | 0 | 2 | 2 | 1  | 1 | 0 | 0 | 0 | 0 | 0  | 0 |
| FBgn0015391                                                     | <b>glu</b>          | 0 | 0 | 0 | 0 | 1  | 1 | 0 | 0 | 0 | 0 | 1  | 1 |
| FBgn0039857                                                     | <b>RpL6</b>         | 0 | 0 | 0 | 0 | 1  | 1 | 0 | 0 | 0 | 0 | 0  | 0 |
| FBgn0015245                                                     | <b>Hsp60</b>        | 0 | 0 | 0 | 0 | 1  | 1 | 0 | 0 | 0 | 0 | 0  | 0 |
| FBgn0260789                                                     | <b>mxc</b>          | 0 | 0 | 0 | 0 | 3  | 3 | 0 | 0 | 0 | 0 | 0  | 0 |
| FBgn0032620                                                     | <b>CG12288</b>      | 0 | 0 | 0 | 0 | 1  | 1 | 0 | 0 | 0 | 0 | 0  | 0 |
| FBgn0001233                                                     | <b>Hsp83</b>        | 0 | 0 | 2 | 2 | 0  | 0 | 0 | 0 | 0 | 0 | 0  | 0 |
| FBgn0024939                                                     | <b>RpL8</b>         | 0 | 0 | 0 | 0 | 1  | 1 | 0 | 0 | 0 | 0 | 0  | 0 |
| FBgn0010551                                                     | <b>I(2)03709</b>    | 0 | 0 | 1 | 1 | 1  | 1 | 0 | 0 | 0 | 0 | 0  | 0 |
| FBgn0086897                                                     | <b>sqd</b>          | 0 | 0 | 0 | 0 | 1  | 1 | 0 | 0 | 0 | 0 | 0  | 0 |

|             |                                   |   |   |   |   |    |    |   |   |   |   |    |   |
|-------------|-----------------------------------|---|---|---|---|----|----|---|---|---|---|----|---|
| FBgn0003360 | <b>sesB</b>                       | 0 | 0 | 6 | 6 | 10 | 9  | 0 | 0 | 0 | 0 | 0  | 0 |
| FBgn0002780 | <b>mod</b>                        | 0 | 0 | 2 | 2 | 4  | 4  | 0 | 0 | 5 | 5 | 3  | 3 |
| FBgn0017545 | <b>RpS3A</b>                      | 0 | 0 | 0 | 0 | 1  | 1  | 0 | 0 | 0 | 0 | 0  | 0 |
| FBgn0035213 | <b>CG2199</b>                     | 0 | 0 | 2 | 1 | 4  | 2  | 0 | 0 | 3 | 1 | 1  | 1 |
| FBgn0000559 | <b>Ef2b</b>                       | 0 | 0 | 4 | 3 | 2  | 2  | 0 | 0 | 0 | 0 | 0  | 0 |
| FBgn0003885 | <b><math>\alpha</math>Tub84D</b>  | 0 | 0 | 6 | 4 | 8  | 3  | 0 | 0 | 1 | 1 | 0  | 0 |
| FBgn0003276 | <b>Rpl1140</b>                    | 0 | 0 | 1 | 1 | 3  | 3  | 0 | 0 | 0 | 0 | 3  | 3 |
| FBgn0003888 | <b><math>\beta</math>Tub60D</b>   | 0 | 0 | 3 | 3 | 7  | 7  | 0 | 0 | 0 | 0 | 0  | 0 |
| FBgn0011211 | <b>blw</b>                        | 0 | 0 | 3 | 3 | 2  | 2  | 0 | 0 | 0 | 0 | 0  | 0 |
| FBgn0037027 | <b>CG3680</b>                     | 0 | 0 | 2 | 2 | 1  | 1  | 0 | 0 | 0 | 0 | 0  | 0 |
| FBgn0004551 | <b>Ca-P60A</b>                    | 0 | 0 | 1 | 1 | 3  | 3  | 0 | 0 | 0 | 0 | 0  | 0 |
| FBgn0086133 | <b>kdn</b>                        | 0 | 0 | 0 | 0 | 1  | 1  | 0 | 0 | 0 | 0 | 0  | 0 |
| FBgn0024332 | <b>Mcm3</b>                       | 0 | 0 | 2 | 2 | 0  | 0  | 0 | 0 | 0 | 0 | 0  | 0 |
| FBgn0027948 | <b>msps</b>                       | 0 | 0 | 0 | 0 | 1  | 1  | 0 | 0 | 0 | 0 | 0  | 0 |
| FBgn0003031 | <b>pAbp</b>                       | 0 | 0 | 1 | 1 | 0  | 0  | 0 | 0 | 0 | 0 | 0  | 0 |
| FBgn0036548 | <b>I(3)72Ab</b>                   | 0 | 0 | 0 | 0 | 0  | 0  | 0 | 0 | 1 | 1 | 0  | 0 |
| FBgn0040283 | <b>SMC1</b>                       | 0 | 0 | 1 | 1 | 0  | 0  | 0 | 0 | 0 | 0 | 0  | 0 |
| FBgn0086254 | <b>CG6084</b>                     | 0 | 0 | 2 | 2 | 4  | 4  | 0 | 0 | 0 | 0 | 0  | 0 |
| FBgn0004363 | <b>porin</b>                      | 0 | 0 | 0 | 0 | 1  | 1  | 0 | 0 | 0 | 0 | 0  | 0 |
| FBgn0021765 | <b>scu</b>                        | 0 | 0 | 0 | 0 | 1  | 1  | 0 | 0 | 0 | 0 | 0  | 0 |
| FBgn0031728 | <b>Hsp60C</b>                     | 0 | 0 | 1 | 1 | 2  | 2  | 0 | 0 | 0 | 0 | 0  | 0 |
| FBgn0020235 | <b>ATPsyn-<math>\gamma</math></b> | 0 | 0 | 1 | 1 | 1  | 1  | 0 | 0 | 0 | 0 | 0  | 0 |
| FBgn0038608 | <b>WRNexo</b>                     | 0 | 0 | 2 | 2 | 4  | 3  | 0 | 0 | 2 | 2 | 1  | 1 |
| FBgn0038609 | <b>Nup43</b>                      | 0 | 0 | 1 | 1 | 0  | 0  | 0 | 0 | 0 | 0 | 0  | 0 |
| FBgn0039713 | <b>RpS8</b>                       | 0 | 0 | 0 | 0 | 3  | 3  | 0 | 0 | 0 | 0 | 0  | 0 |
| FBgn0002924 | <b>ncd</b>                        | 0 | 0 | 0 | 0 | 0  | 0  | 0 | 0 | 0 | 0 | 1  | 1 |
| FBgn0011604 | <b>lswi</b>                       | 0 | 0 | 3 | 2 | 17 | 15 | 0 | 0 | 2 | 2 | 11 | 8 |
| FBgn0026577 | <b>CG8677</b>                     | 0 | 0 | 0 | 0 | 1  | 1  | 0 | 0 | 1 | 1 | 0  | 0 |
| FBgn0260817 | <b>gkt</b>                        | 0 | 0 | 0 | 0 | 2  | 1  | 0 | 0 | 0 | 0 | 0  | 0 |
| FBgn0001942 | <b>eIF-4a</b>                     | 0 | 0 | 1 | 1 | 1  | 1  | 0 | 0 | 0 | 0 | 0  | 0 |
| FBgn0003887 | <b><math>\beta</math>Tub56D</b>   | 0 | 0 | 2 | 1 | 3  | 2  | 0 | 0 | 1 | 1 | 0  | 0 |
| FBgn0015615 | <b>Cap</b>                        | 0 | 0 | 0 | 0 | 5  | 5  | 0 | 0 | 0 | 0 | 2  | 1 |
| FBgn0004922 | <b>RpS6</b>                       | 0 | 0 | 1 | 1 | 2  | 2  | 0 | 0 | 0 | 0 | 0  | 0 |
| FBgn0030054 | <b>Caf1-180</b>                   | 0 | 0 | 2 | 1 | 2  | 2  | 0 | 0 | 0 | 0 | 0  | 0 |
| FBgn0039877 | <b>CG2118</b>                     | 0 | 0 | 0 | 0 | 1  | 1  | 0 | 0 | 0 | 0 | 0  | 0 |
| FBgn0085261 | <b>SA</b>                         | 0 | 0 | 3 | 3 | 4  | 4  | 0 | 0 | 0 | 0 | 0  | 0 |
| FBgn0086902 | <b>kis</b>                        | 0 | 0 | 0 | 0 | 1  | 1  | 0 | 0 | 0 | 0 | 0  | 0 |
| FBgn0002441 | <b>I(3)mbt</b>                    | 0 | 0 | 0 | 0 | 0  | 0  | 0 | 0 | 0 | 0 | 1  | 1 |
| FBgn0003567 | <b>su(Hw)</b>                     | 0 | 0 | 0 | 0 | 3  | 3  | 0 | 0 | 0 | 0 | 3  | 3 |
| FBgn0040268 | <b>Top3<math>\alpha</math></b>    | 0 | 0 | 1 | 1 | 3  | 3  | 0 | 0 | 3 | 3 | 4  | 4 |
| FBgn0003261 | <b>Rm62</b>                       | 0 | 0 | 0 | 0 | 4  | 4  | 0 | 0 | 0 | 0 | 0  | 0 |

|             |                                      |   |   |    |    |    |    |   |   |    |   |    |   |
|-------------|--------------------------------------|---|---|----|----|----|----|---|---|----|---|----|---|
| FBgn0004587 | <b>B52</b>                           | 0 | 0 | 0  | 0  | 0  | 0  | 0 | 0 | 1  | 1 | 2  | 1 |
| FBgn0010774 | <b>Aly</b>                           | 0 | 0 | 1  | 1  | 0  | 0  | 0 | 0 | 0  | 0 | 0  | 0 |
| FBgn0005630 | <b>lola</b>                          | 0 | 0 | 1  | 1  | 0  | 0  | 0 | 0 | 1  | 1 | 0  | 0 |
| FBgn0260991 | <b>Incenp</b>                        | 0 | 0 | 28 | 13 | 20 | 9  | 0 | 0 | 11 | 5 | 1  | 1 |
| FBgn0037810 | <b>sle</b>                           | 0 | 0 | 32 | 15 | 22 | 15 | 0 | 0 | 10 | 8 | 2  | 2 |
| FBgn0003277 | <b>RplI215</b>                       | 0 | 0 | 0  | 0  | 6  | 6  | 0 | 0 | 0  | 0 | 2  | 2 |
| FBgn0015929 | <b>dpa</b>                           | 0 | 0 | 2  | 2  | 1  | 1  | 0 | 0 | 0  | 0 | 0  | 0 |
| FBgn0030301 | <b>HP5</b>                           | 0 | 0 | 4  | 3  | 0  | 0  | 0 | 0 | 1  | 1 | 1  | 1 |
| FBgn0260012 | <b>pds5</b>                          | 0 | 0 | 1  | 1  | 1  | 1  | 0 | 0 | 2  | 2 | 0  | 0 |
| FBgn0002542 | <b>lds</b>                           | 0 | 0 | 0  | 0  | 1  | 1  | 0 | 0 | 0  | 0 | 0  | 0 |
| FBgn0029704 | <b>CG2982</b>                        | 0 | 0 | 0  | 0  | 3  | 3  | 0 | 0 | 0  | 0 | 0  | 0 |
| FBgn0011785 | <b>BRWD3</b>                         | 0 | 0 | 0  | 0  | 0  | 0  | 0 | 0 | 0  | 0 | 1  | 1 |
| FBgn0000541 | <b>E(bx)</b>                         | 0 | 0 | 0  | 0  | 4  | 4  | 0 | 0 | 1  | 1 | 3  | 3 |
| FBgn0026575 | <b>hang</b>                          | 0 | 0 | 0  | 0  | 0  | 0  | 0 | 0 | 0  | 0 | 1  | 1 |
| FBgn0014026 | <b>RpL7A</b>                         | 0 | 0 | 1  | 1  | 0  | 0  | 0 | 0 | 0  | 0 | 0  | 0 |
| FBgn0023509 | <b>mip130</b>                        | 0 | 0 | 0  | 0  | 1  | 1  | 0 | 0 | 0  | 0 | 0  | 0 |
| FBgn0012036 | <b>Aldh</b>                          | 0 | 0 | 0  | 0  | 1  | 1  | 0 | 0 | 0  | 0 | 0  | 0 |
| FBgn0003278 | <b>Rpl135</b>                        | 0 | 0 | 0  | 0  | 1  | 1  | 0 | 0 | 0  | 0 | 0  | 0 |
| FBgn0025815 | <b>Mcm6</b>                          | 0 | 0 | 2  | 2  | 0  | 0  | 0 | 0 | 0  | 0 | 0  | 0 |
| FBgn0017577 | <b>Mcm5</b>                          | 0 | 0 | 5  | 5  | 3  | 3  | 0 | 0 | 0  | 0 | 0  | 0 |
| FBgn0004227 | <b>nonA</b>                          | 0 | 0 | 0  | 0  | 0  | 0  | 0 | 0 | 0  | 0 | 1  | 1 |
| FBgn0250754 | <b>CG42232</b>                       | 0 | 0 | 0  | 0  | 0  | 0  | 0 | 0 | 0  | 0 | 3  | 3 |
| FBgn0011272 | <b>RpL13</b>                         | 0 | 0 | 0  | 0  | 0  | 0  | 0 | 0 | 0  | 0 | 1  | 1 |
| FBgn0043456 | <b>CG4747</b>                        | 0 | 0 | 3  | 3  | 17 | 11 | 0 | 0 | 2  | 1 | 11 | 7 |
| FBgn0015268 | <b>Nap1</b>                          | 0 | 0 | 0  | 0  | 1  | 1  | 0 | 0 | 0  | 0 | 0  | 0 |
| FBgn0037082 | <b>CG5664</b>                        | 0 | 0 | 1  | 1  | 0  | 0  | 0 | 0 | 0  | 0 | 0  | 0 |
| FBgn0000212 | <b>brm</b>                           | 0 | 0 | 0  | 0  | 3  | 3  | 0 | 0 | 0  | 0 | 1  | 1 |
| FBgn0259113 | <b>DNApol-<math>\alpha</math>180</b> | 0 | 0 | 0  | 0  | 5  | 5  | 0 | 0 | 0  | 0 | 0  | 0 |
| FBgn0025716 | <b>Bap55</b>                         | 0 | 0 | 0  | 0  | 5  | 4  | 0 | 0 | 0  | 0 | 0  | 0 |
| FBgn0040237 | <b>bor</b>                           | 0 | 0 | 1  | 1  | 0  | 0  | 0 | 0 | 0  | 0 | 0  | 0 |
| FBgn0036478 | <b>CTPsyn</b>                        | 0 | 0 | 1  | 1  | 0  | 0  | 0 | 0 | 0  | 0 | 0  | 0 |
| FBgn0002906 | <b>mus309</b>                        | 0 | 0 | 0  | 0  | 1  | 1  | 0 | 0 | 0  | 0 | 1  | 1 |
| FBgn0036486 | <b>Msh6</b>                          | 0 | 0 | 0  | 0  | 1  | 1  | 0 | 0 | 0  | 0 | 0  | 0 |
| FBgn0036213 | <b>RpL10Ab</b>                       | 0 | 0 | 1  | 1  | 1  | 1  | 0 | 0 | 0  | 0 | 0  | 0 |
| FBgn0033062 | <b>Ars2</b>                          | 0 | 0 | 0  | 0  | 1  | 1  | 0 | 0 | 0  | 0 | 0  | 0 |
| FBgn0019644 | <b>ATPsyn-b</b>                      | 0 | 0 | 0  | 0  | 1  | 1  | 0 | 0 | 0  | 0 | 0  | 0 |
| FBgn0013756 | <b>Mtor</b>                          | 0 | 0 | 0  | 0  | 1  | 1  | 0 | 0 | 0  | 0 | 0  | 0 |
| FBgn0031759 | <b>lid</b>                           | 0 | 0 | 0  | 0  | 4  | 4  | 0 | 0 | 0  | 0 | 2  | 2 |
| FBgn0004378 | <b>Klp61F</b>                        | 0 | 0 | 0  | 0  | 1  | 1  | 0 | 0 | 0  | 0 | 1  | 1 |
| FBgn0005655 | <b>mus209</b>                        | 0 | 0 | 0  | 0  | 2  | 2  | 0 | 0 | 0  | 0 | 0  | 0 |
| FBgn0010100 | <b>Acon</b>                          | 0 | 0 | 0  | 0  | 1  | 1  | 0 | 0 | 0  | 0 | 0  | 0 |

|                                                     |                                 |   |   |    |   |   |   |   |   |   |   |   |   |
|-----------------------------------------------------|---------------------------------|---|---|----|---|---|---|---|---|---|---|---|---|
| FBgn0032906                                         | <b>RPA2</b>                     | 0 | 0 | 0  | 0 | 6 | 6 | 0 | 0 | 1 | 1 | 2 | 2 |
| FBgn0027338                                         | <b>Kap-<math>\alpha</math>3</b> | 0 | 0 | 0  | 0 | 1 | 1 | 0 | 0 | 0 | 0 | 0 | 0 |
| FBgn0040075                                         | <b>rept</b>                     | 0 | 0 | 1  | 1 | 5 | 5 | 0 | 0 | 2 | 2 | 1 | 1 |
| <b>Proteins not identified in negative controls</b> |                                 |   |   |    |   |   |   |   |   |   |   |   |   |
| FBgn0001149                                         | <b>GstD1</b>                    | 0 | 0 | 0  | 0 | 0 | 0 | 0 | 0 | 1 | 1 | 0 | 0 |
| FBgn0037811                                         | <b>CG12592</b>                  | 0 | 0 | 1  | 1 | 0 | 0 | 0 | 0 | 0 | 0 | 0 | 0 |
| FBgn0034390                                         | <b>CG15093</b>                  | 0 | 0 | 1  | 1 | 0 | 0 | 0 | 0 | 0 | 0 | 0 | 0 |
| FBgn0020270                                         | <b>mre11</b>                    | 0 | 0 | 1  | 1 | 0 | 0 | 0 | 0 | 0 | 0 | 0 | 0 |
| FBgn0024804                                         | <b>Dbp80</b>                    | 0 | 0 | 0  | 0 | 0 | 0 | 0 | 0 | 1 | 1 | 0 | 0 |
| FBgn0030269                                         | <b>CG18292</b>                  | 0 | 0 | 1  | 1 | 0 | 0 | 0 | 0 | 0 | 0 | 0 | 0 |
| FBgn0002872                                         | <b>mu2</b>                      | 0 | 0 | 2  | 2 | 0 | 0 | 0 | 0 | 0 | 0 | 0 | 0 |
| FBgn0015024                                         | <b>Ckl<math>\alpha</math></b>   | 0 | 0 | 0  | 0 | 0 | 0 | 0 | 0 | 1 | 1 | 0 | 0 |
| FBgn0023181                                         | <b>Orc4</b>                     | 0 | 0 | 1  | 1 | 0 | 0 | 0 | 0 | 0 | 0 | 0 | 0 |
| FBgn0015270                                         | <b>Orc2</b>                     | 0 | 0 | 2  | 2 | 0 | 0 | 0 | 0 | 0 | 0 | 0 | 0 |
| FBgn0032988                                         | <b>Tif-IA</b>                   | 0 | 0 | 1  | 1 | 0 | 0 | 0 | 0 | 1 | 1 | 0 | 0 |
| FBgn0053523                                         | <b>CG33523</b>                  | 0 | 0 | 1  | 1 | 0 | 0 | 0 | 0 | 0 | 0 | 0 | 0 |
| FBgn0005654                                         | <b>lat</b>                      | 0 | 0 | 1  | 1 | 0 | 0 | 0 | 0 | 0 | 0 | 0 | 0 |
| FBgn0030853                                         | <b>CG5703</b>                   | 0 | 0 | 1  | 1 | 0 | 0 | 0 | 0 | 0 | 0 | 0 | 0 |
| FBgn0026257                                         | <b>cav</b>                      | 0 | 0 | 1  | 1 | 0 | 0 | 0 | 0 | 0 | 0 | 0 | 0 |
| FBgn0003600                                         | <b>Su(var)3-9</b>               | 0 | 0 | 4  | 4 | 0 | 0 | 0 | 0 | 0 | 0 | 0 | 0 |
| FBgn0035689                                         | <b>CG7376</b>                   | 0 | 0 | 1  | 1 | 0 | 0 | 0 | 0 | 0 | 0 | 0 | 0 |
| FBgn0026573                                         | <b>CG8290</b>                   | 0 | 0 | 8  | 6 | 0 | 0 | 0 | 0 | 0 | 0 | 0 | 0 |
| FBgn0037621                                         | <b>CG9797</b>                   | 0 | 0 | 1  | 1 | 0 | 0 | 0 | 0 | 0 | 0 | 0 | 0 |
| FBgn0037633                                         | <b>CG9839</b>                   | 0 | 0 | 1  | 1 | 0 | 0 | 0 | 0 | 0 | 0 | 0 | 0 |
| FBgn0033951                                         | <b>CG10139</b>                  | 0 | 0 | 0  | 0 | 1 | 1 | 0 | 0 | 0 | 0 | 0 | 0 |
| FBgn0026196                                         | <b>Nop5</b>                     | 0 | 0 | 1  | 1 | 0 | 0 | 0 | 0 | 0 | 0 | 1 | 1 |
| FBgn0004838                                         | <b>Hrb27C</b>                   | 0 | 0 | 0  | 0 | 0 | 0 | 0 | 0 | 0 | 0 | 1 | 1 |
| FBgn0261403                                         | <b>sxc</b>                      | 0 | 0 | 0  | 0 | 1 | 1 | 0 | 0 | 0 | 0 | 0 | 0 |
| FBgn0086441                                         | <b>Acn</b>                      | 0 | 0 | 0  | 0 | 0 | 0 | 0 | 0 | 0 | 0 | 1 | 1 |
| FBgn0015657                                         | <b>DnaJ-1</b>                   | 0 | 0 | 0  | 0 | 1 | 1 | 0 | 0 | 0 | 0 | 0 | 0 |
| FBgn0003082                                         | <b>phr</b>                      | 0 | 0 | 0  | 0 | 1 | 1 | 0 | 0 | 0 | 0 | 0 | 0 |
| FBgn0027334                                         | <b>I(1)G0004</b>                | 0 | 0 | 0  | 0 | 1 | 1 | 0 | 0 | 0 | 0 | 0 | 0 |
| FBgn0250830                                         | <b>CG12547</b>                  | 0 | 0 | 0  | 0 | 1 | 1 | 0 | 0 | 0 | 0 | 0 | 0 |
| FBgn0040465                                         | <b>Dip3</b>                     | 0 | 0 | 10 | 5 | 1 | 1 | 0 | 0 | 0 | 0 | 0 | 0 |
| FBgn0033526                                         | <b>Caf1-105</b>                 | 0 | 0 | 0  | 0 | 1 | 1 | 0 | 0 | 0 | 0 | 0 | 0 |
| FBgn0033609                                         | <b>fbl6</b>                     | 0 | 0 | 0  | 0 | 0 | 0 | 0 | 0 | 2 | 2 | 1 | 1 |
| FBgn0038964                                         | <b>Nop56</b>                    | 0 | 0 | 1  | 1 | 1 | 1 | 0 | 0 | 0 | 0 | 0 | 0 |
| FBgn0030268                                         | <b>Klp10A</b>                   | 0 | 0 | 0  | 0 | 1 | 1 | 0 | 0 | 0 | 0 | 0 | 0 |
| FBgn0038035                                         | <b>lig3</b>                     | 0 | 0 | 0  | 0 | 0 | 0 | 0 | 0 | 0 | 0 | 1 | 1 |
| FBgn0038827                                         | <b>Fancd2</b>                   | 0 | 0 | 0  | 0 | 1 | 1 | 0 | 0 | 0 | 0 | 0 | 0 |



|             |                                     |   |   |   |   |   |   |   |   |   |   |   |   |
|-------------|-------------------------------------|---|---|---|---|---|---|---|---|---|---|---|---|
| FBgn0033934 | <b>CG17385</b>                      | 0 | 0 | 0 | 0 | 0 | 0 | 0 | 0 | 0 | 0 | 1 | 1 |
| FBgn0023537 | <b>CG17896</b>                      | 0 | 0 | 0 | 0 | 1 | 1 | 0 | 0 | 0 | 0 | 0 | 0 |
| FBgn0010342 | <b>Map60</b>                        | 0 | 0 | 0 | 0 | 1 | 1 | 0 | 0 | 0 | 0 | 0 | 0 |
| FBgn0033107 | <b>koi</b>                          | 0 | 0 | 1 | 1 | 1 | 1 | 0 | 0 | 0 | 0 | 0 | 0 |
| FBgn0004399 | <b>psq</b>                          | 0 | 0 | 0 | 0 | 0 | 0 | 0 | 0 | 2 | 2 | 1 | 1 |
| FBgn0250753 | <b>exba</b>                         | 0 | 0 | 0 | 0 | 1 | 1 | 0 | 0 | 0 | 0 | 0 | 0 |
| FBgn0034962 | <b>MAN1</b>                         | 0 | 0 | 0 | 0 | 1 | 1 | 0 | 0 | 0 | 0 | 0 | 0 |
| FBgn0001133 | <b>grau</b>                         | 0 | 0 | 0 | 0 | 0 | 0 | 0 | 0 | 0 | 0 | 1 | 1 |
| FBgn0015737 | <b>Hmu</b>                          | 0 | 0 | 0 | 0 | 1 | 1 | 0 | 0 | 0 | 0 | 0 | 0 |
| FBgn0011327 | <b>Uch-L3</b>                       | 0 | 0 | 0 | 0 | 1 | 1 | 0 | 0 | 0 | 0 | 0 | 0 |
| FBgn0010422 | <b>TfIIIS</b>                       | 0 | 0 | 0 | 0 | 1 | 1 | 0 | 0 | 0 | 0 | 0 | 0 |
| FBgn0030418 | <b>CG4004</b>                       | 0 | 0 | 4 | 1 | 1 | 1 | 0 | 0 | 0 | 0 | 0 | 0 |
| FBgn0001986 | <b>I(2)35Df</b>                     | 0 | 0 | 0 | 0 | 1 | 1 | 0 | 0 | 0 | 0 | 0 | 0 |
| FBgn0004926 | <b>eIF-2<math>\beta</math></b>      | 0 | 0 | 1 | 1 | 1 | 1 | 0 | 0 | 0 | 0 | 0 | 0 |
| FBgn0015546 | <b>spel1</b>                        | 0 | 0 | 1 | 1 | 0 | 0 | 0 | 0 | 0 | 0 | 1 | 1 |
| FBgn0016687 | <b>Nurf-38</b>                      | 0 | 0 | 0 | 0 | 0 | 0 | 0 | 0 | 0 | 0 | 1 | 1 |
| FBgn0020633 | <b>Mcm7</b>                         | 0 | 0 | 2 | 2 | 1 | 1 | 0 | 0 | 0 | 0 | 0 | 0 |
| FBgn0000566 | <b>Eip55E</b>                       | 0 | 0 | 3 | 3 | 1 | 1 | 0 | 0 | 0 | 0 | 0 | 0 |
| FBgn0011016 | <b>SsR<math>\beta</math></b>        | 0 | 0 | 0 | 0 | 1 | 1 | 0 | 0 | 0 | 0 | 0 | 0 |
| FBgn0011236 | <b>ken</b>                          | 0 | 0 | 1 | 1 | 1 | 1 | 0 | 0 | 0 | 0 | 0 | 0 |
| FBgn0015790 | <b>Rab11</b>                        | 0 | 0 | 0 | 0 | 1 | 1 | 0 | 0 | 0 | 0 | 0 | 0 |
| FBgn0039125 | <b>CG5857</b>                       | 0 | 0 | 0 | 0 | 1 | 1 | 0 | 0 | 0 | 0 | 0 | 0 |
| FBgn0005696 | <b>DNApol-<math>\alpha</math>73</b> | 0 | 0 | 0 | 0 | 1 | 1 | 0 | 0 | 0 | 0 | 0 | 0 |
| FBgn0016693 | <b>Past1</b>                        | 0 | 0 | 0 | 0 | 1 | 1 | 0 | 0 | 0 | 0 | 0 | 0 |
| FBgn0020412 | <b>JIL-1</b>                        | 0 | 0 | 0 | 0 | 0 | 0 | 0 | 0 | 0 | 0 | 1 | 1 |
| FBgn0020443 | <b>Elf</b>                          | 0 | 0 | 0 | 0 | 1 | 1 | 0 | 0 | 0 | 0 | 0 | 0 |
| FBgn0024227 | <b>ial</b>                          | 0 | 0 | 5 | 5 | 1 | 1 | 0 | 0 | 1 | 1 | 0 | 0 |
| FBgn0030093 | <b>dalao</b>                        | 0 | 0 | 0 | 0 | 1 | 1 | 0 | 0 | 0 | 0 | 0 | 0 |
| FBgn0015805 | <b>Rpd3</b>                         | 0 | 0 | 0 | 0 | 1 | 1 | 0 | 0 | 0 | 0 | 0 | 0 |
| FBgn0014861 | <b>Mcm2</b>                         | 0 | 0 | 3 | 2 | 1 | 1 | 0 | 0 | 0 | 0 | 0 | 0 |
| FBgn0025457 | <b>Bub3</b>                         | 0 | 0 | 1 | 1 | 1 | 1 | 0 | 0 | 0 | 0 | 0 | 0 |
| FBgn0260962 | <b>pic</b>                          | 0 | 0 | 0 | 0 | 1 | 1 | 0 | 0 | 0 | 0 | 0 | 0 |
| FBgn0039697 | <b>CG7834</b>                       | 0 | 0 | 1 | 1 | 1 | 1 | 0 | 0 | 0 | 0 | 0 | 0 |
| FBgn0026373 | <b>RplI33</b>                       | 0 | 0 | 1 | 1 | 0 | 0 | 0 | 0 | 0 | 0 | 1 | 1 |
| FBgn0001179 | <b>hay</b>                          | 0 | 0 | 0 | 0 | 1 | 1 | 0 | 0 | 0 | 0 | 0 | 0 |
| FBgn0033897 | <b>Rcd1</b>                         | 0 | 0 | 0 | 0 | 0 | 0 | 0 | 0 | 0 | 0 | 1 | 1 |
| FBgn0011704 | <b>RnrS</b>                         | 0 | 0 | 0 | 0 | 1 | 1 | 0 | 0 | 0 | 0 | 0 | 0 |
| FBgn0031769 | <b>CG9135</b>                       | 0 | 0 | 0 | 0 | 1 | 1 | 0 | 0 | 0 | 0 | 0 | 0 |
| FBgn0037669 | <b>CG9740</b>                       | 0 | 0 | 0 | 0 | 1 | 1 | 0 | 0 | 0 | 0 | 0 | 0 |
| FBgn0003687 | <b>Tbp</b>                          | 0 | 0 | 0 | 0 | 1 | 1 | 0 | 0 | 0 | 0 | 0 | 0 |
| FBgn0004925 | <b>eIF-2<math>\alpha</math></b>     | 0 | 0 | 2 | 2 | 1 | 1 | 0 | 0 | 0 | 0 | 0 | 0 |

|             |                     |   |   |    |   |   |   |   |   |   |   |   |   |
|-------------|---------------------|---|---|----|---|---|---|---|---|---|---|---|---|
| FBgn0010416 | <b>TH1</b>          | 0 | 0 | 0  | 0 | 1 | 1 | 0 | 0 | 0 | 0 | 0 | 0 |
| FBgn0040265 | <b>Transpac\pol</b> | 0 | 0 | 0  | 0 | 0 | 0 | 0 | 0 | 0 | 0 | 1 | 1 |
| FBgn0011715 | <b>Snr1</b>         | 0 | 0 | 0  | 0 | 2 | 1 | 0 | 0 | 0 | 0 | 0 | 0 |
| FBgn0022772 | <b>Orc1</b>         | 0 | 0 | 0  | 0 | 2 | 1 | 0 | 0 | 0 | 0 | 0 | 0 |
| FBgn0033571 | <b>Rpb5</b>         | 0 | 0 | 0  | 0 | 2 | 2 | 0 | 0 | 0 | 0 | 0 | 0 |
| FBgn0000054 | <b>Adf1</b>         | 0 | 0 | 0  | 0 | 2 | 2 | 0 | 0 | 0 | 0 | 0 | 0 |
| FBgn0086855 | <b>CG17078</b>      | 0 | 0 | 0  | 0 | 1 | 1 | 0 | 0 | 0 | 0 | 1 | 1 |
| FBgn0040066 | <b>wds</b>          | 0 | 0 | 0  | 0 | 1 | 1 | 0 | 0 | 0 | 0 | 1 | 1 |
| FBgn0051363 | <b>Jupiter</b>      | 0 | 0 | 1  | 1 | 2 | 2 | 0 | 0 | 0 | 0 | 0 | 0 |
| FBgn0034961 | <b>CG3163</b>       | 0 | 0 | 12 | 7 | 2 | 2 | 0 | 0 | 2 | 1 | 0 | 0 |
| FBgn0045852 | <b>ham</b>          | 0 | 0 | 1  | 1 | 2 | 1 | 0 | 0 | 0 | 0 | 0 | 0 |
| FBgn0064122 | <b>CG33691</b>      | 0 | 0 | 3  | 1 | 2 | 1 | 0 | 0 | 1 | 1 | 0 | 0 |
| FBgn0003507 | <b>srp</b>          | 0 | 0 | 1  | 1 | 2 | 1 | 0 | 0 | 0 | 0 | 0 | 0 |
| FBgn0022720 | <b>zf30C</b>        | 0 | 0 | 0  | 0 | 2 | 2 | 0 | 0 | 0 | 0 | 0 | 0 |
| FBgn0029798 | <b>CG4078</b>       | 0 | 0 | 0  | 0 | 2 | 2 | 0 | 0 | 0 | 0 | 0 | 0 |
| FBgn0011823 | <b>Pen</b>          | 0 | 0 | 0  | 0 | 2 | 2 | 0 | 0 | 0 | 0 | 0 | 0 |
| FBgn0004106 | <b>cdc2</b>         | 0 | 0 | 0  | 0 | 2 | 2 | 0 | 0 | 0 | 0 | 0 | 0 |
| FBgn0011703 | <b>RnrL</b>         | 0 | 0 | 1  | 1 | 2 | 1 | 0 | 0 | 0 | 0 | 0 | 0 |
| FBgn0039019 | <b>HP1c</b>         | 0 | 0 | 0  | 0 | 2 | 2 | 0 | 0 | 0 | 0 | 0 | 0 |
| FBgn0030082 | <b>HP1b</b>         | 0 | 0 | 0  | 0 | 1 | 1 | 0 | 0 | 0 | 0 | 1 | 1 |
| FBgn0031977 | <b>baf</b>          | 0 | 0 | 1  | 1 | 1 | 1 | 0 | 0 | 1 | 1 | 1 | 1 |
| FBgn0003013 | <b>osa</b>          | 0 | 0 | 0  | 0 | 2 | 2 | 0 | 0 | 0 | 0 | 0 | 0 |
| FBgn0003612 | <b>Su(var)2-10</b>  | 0 | 0 | 3  | 2 | 2 | 2 | 0 | 0 | 0 | 0 | 0 | 0 |
| FBgn0000289 | <b>cg</b>           | 0 | 0 | 0  | 0 | 2 | 2 | 0 | 0 | 1 | 1 | 0 | 0 |
| FBgn0022764 | <b>Sin3A</b>        | 0 | 0 | 0  | 0 | 1 | 1 | 0 | 0 | 0 | 0 | 1 | 1 |
| FBgn0037719 | <b>bocksbeutel</b>  | 0 | 0 | 0  | 0 | 2 | 2 | 0 | 0 | 1 | 1 | 0 | 0 |
| FBgn0026401 | <b>Nipped-B</b>     | 0 | 0 | 0  | 0 | 3 | 3 | 0 | 0 | 0 | 0 | 0 | 0 |
| FBgn0022349 | <b>CG1910</b>       | 0 | 0 | 1  | 1 | 1 | 1 | 0 | 0 | 2 | 1 | 2 | 1 |
| FBgn0010247 | <b>Parp</b>         | 0 | 0 | 0  | 0 | 1 | 1 | 0 | 0 | 0 | 0 | 2 | 2 |
| FBgn0032105 | <b>borr</b>         | 0 | 0 | 10 | 6 | 3 | 3 | 0 | 0 | 0 | 0 | 0 | 0 |
| FBgn0001224 | <b>Hsp23</b>        | 0 | 0 | 0  | 0 | 0 | 0 | 0 | 0 | 1 | 1 | 3 | 3 |
| FBgn0026533 | <b>Dek</b>          | 0 | 0 | 0  | 0 | 1 | 1 | 0 | 0 | 1 | 1 | 2 | 1 |
| FBgn0000283 | <b>Cp190</b>        | 0 | 0 | 0  | 0 | 0 | 0 | 0 | 0 | 0 | 0 | 3 | 3 |
| FBgn0011606 | <b>Klp3A</b>        | 0 | 0 | 0  | 0 | 1 | 1 | 0 | 0 | 0 | 0 | 2 | 2 |
| FBgn0015602 | <b>BEAF-32</b>      | 0 | 0 | 0  | 0 | 4 | 3 | 0 | 0 | 0 | 0 | 0 | 0 |
| FBgn0035370 | <b>CG1240</b>       | 0 | 0 | 1  | 1 | 2 | 2 | 0 | 0 | 1 | 1 | 2 | 2 |
| FBgn0034878 | <b>pita</b>         | 0 | 0 | 0  | 0 | 2 | 1 | 0 | 0 | 0 | 0 | 2 | 1 |
| FBgn0015610 | <b>Caf1</b>         | 0 | 0 | 2  | 2 | 2 | 2 | 0 | 0 | 1 | 1 | 2 | 1 |
| FBgn0027381 | <b>Idefix\gag</b>   | 0 | 0 | 3  | 3 | 4 | 4 | 0 | 0 | 2 | 2 | 0 | 0 |
| FBgn0044324 | <b>Chro</b>         | 0 | 0 | 0  | 0 | 2 | 2 | 0 | 0 | 0 | 0 | 3 | 2 |
| FBgn0037659 | <b>Kdm2</b>         | 0 | 0 | 0  | 0 | 2 | 2 | 0 | 0 | 0 | 0 | 3 | 2 |

|             |               |   |   |    |    |    |    |   |   |    |   |    |   |
|-------------|---------------|---|---|----|----|----|----|---|---|----|---|----|---|
| FBgn0002783 | <b>mor</b>    | 0 | 0 | 0  | 0  | 5  | 4  | 0 | 0 | 0  | 0 | 0  | 0 |
| FBgn0001994 | <b>crp</b>    | 0 | 0 | 0  | 0  | 5  | 3  | 0 | 0 | 0  | 0 | 0  | 0 |
| FBgn0039743 | <b>CG7946</b> | 0 | 0 | 0  | 0  | 0  | 0  | 0 | 0 | 1  | 1 | 5  | 4 |
| FBgn0015623 | <b>Cpr</b>    | 0 | 0 | 0  | 0  | 1  | 1  | 0 | 0 | 0  | 0 | 5  | 4 |
| FBgn0031057 | <b>Ubqn</b>   | 0 | 0 | 0  | 0  | 6  | 5  | 0 | 0 | 0  | 0 | 0  | 0 |
| FBgn0039338 | <b>XNP</b>    | 0 | 0 | 14 | 11 | 6  | 6  | 0 | 0 | 3  | 3 | 0  | 0 |
| FBgn0015664 | <b>Dref</b>   | 0 | 0 | 1  | 1  | 4  | 4  | 0 | 0 | 0  | 0 | 2  | 1 |
| FBgn0259785 | <b>pzg</b>    | 0 | 0 | 0  | 0  | 4  | 4  | 0 | 0 | 0  | 0 | 2  | 2 |
| FBgn0033039 | <b>gp210</b>  | 0 | 0 | 1  | 1  | 4  | 4  | 0 | 0 | 0  | 0 | 2  | 2 |
| FBgn0028700 | <b>RfC38</b>  | 0 | 0 | 0  | 0  | 5  | 5  | 0 | 0 | 1  | 1 | 2  | 2 |
| FBgn0000412 | <b>D1</b>     | 0 | 0 | 0  | 0  | 4  | 3  | 0 | 0 | 3  | 2 | 3  | 3 |
| FBgn0020309 | <b>croI</b>   | 0 | 0 | 5  | 2  | 7  | 4  | 0 | 0 | 1  | 1 | 1  | 1 |
| FBgn0034657 | <b>LBR</b>    | 0 | 0 | 3  | 2  | 6  | 3  | 0 | 0 | 0  | 0 | 2  | 2 |
| FBgn0013591 | <b>Mi-2</b>   | 0 | 0 | 0  | 0  | 5  | 4  | 0 | 0 | 3  | 3 | 3  | 3 |
| FBgn0030854 | <b>CG8289</b> | 0 | 0 | 7  | 4  | 7  | 6  | 0 | 0 | 10 | 6 | 1  | 1 |
| FBgn0020255 | <b>ran</b>    | 0 | 0 | 4  | 3  | 6  | 6  | 0 | 0 | 1  | 1 | 4  | 4 |
| FBgn0013263 | <b>Trl</b>    | 0 | 0 | 9  | 3  | 9  | 3  | 0 | 0 | 3  | 2 | 2  | 1 |
| FBgn0026170 | <b>smt3</b>   | 0 | 0 | 17 | 5  | 11 | 4  | 0 | 0 | 5  | 1 | 1  | 1 |
| FBgn0040078 | <b>pont</b>   | 0 | 0 | 0  | 0  | 6  | 5  | 0 | 0 | 0  | 0 | 7  | 5 |
| FBgn0038016 | <b>MBD-R2</b> | 0 | 0 | 0  | 0  | 0  | 0  | 0 | 0 | 0  | 0 | 1  | 1 |
| FBgn0002638 | <b>Bj1</b>    | 0 | 0 | 18 | 9  | 14 | 10 | 0 | 0 | 5  | 3 | 9  | 7 |
| FBgn0004584 | <b>Rrp1</b>   | 0 | 0 | 7  | 7  | 13 | 13 | 0 | 0 | 7  | 6 | 14 | 9 |

**Table S2:** GO Term enrichment for TAS-L and TAS-R purifications

| TAS-R, TAS-L proteins (aggregate) |    |      |       |          |        |              |                                                                                     |
|-----------------------------------|----|------|-------|----------|--------|--------------|-------------------------------------------------------------------------------------|
| Rank                              | N  | X    | LOD   | P        | P-adj  | GO Attribute |                                                                                     |
| 1                                 | 49 | 1698 | 1.273 | 2.60E-28 | <0.001 | GO:0005634   | nucleus                                                                             |
| 2                                 | 50 | 2641 | 1.07  | 1.60E-20 | <0.001 | GO:0043231   | intracellular membrane-bounded organelle                                            |
| 3                                 | 50 | 2644 | 1.07  | 1.70E-20 | <0.001 | GO:0043227   | membrane-bounded organelle                                                          |
| 4                                 | 52 | 3171 | 1.044 | 6.90E-19 | <0.001 | GO:0043229   | intracellular organelle                                                             |
| 5                                 | 52 | 3173 | 1.044 | 7.10E-19 | <0.001 | GO:0043226   | organelle                                                                           |
| 6                                 | 55 | 4069 | 1.028 | 1.10E-16 | <0.001 | GO:0044424   | intracellular part                                                                  |
| 7                                 | 56 | 4485 | 1.016 | 1.50E-15 | <0.001 | GO:0005622   | intracellular                                                                       |
| 8                                 | 29 | 936  | 0.98  | 1.80E-15 | <0.001 | GO:0003677   | DNA binding                                                                         |
| 9                                 | 11 | 60   | 1.691 | 1.90E-14 | <0.001 | GO:0003682   | chromatin binding                                                                   |
| 10                                | 26 | 828  | 0.956 | 7.00E-14 | <0.001 | GO:0006350   | transcription                                                                       |
| 11                                | 34 | 1567 | 0.859 | 8.60E-14 | <0.001 | GO:0006139   | nucleobase, nucleoside, nucleotide and nucleic acid metabolic process               |
| 12                                | 18 | 339  | 1.135 | 2.20E-13 | <0.001 | GO:0005694   | chromosome                                                                          |
| 13                                | 17 | 290  | 1.174 | 2.30E-13 | <0.001 | GO:0044427   | chromosomal part                                                                    |
| 14                                | 24 | 739  | 0.954 | 4.40E-13 | <0.001 | GO:0045449   | regulation of transcription                                                         |
| 15                                | 19 | 437  | 1.049 | 1.50E-12 | <0.001 | GO:0051276   | chromosome organization and biogenesis                                              |
| 16                                | 24 | 808  | 0.911 | 3.00E-12 | <0.001 | GO:0019219   | regulation of nucleobase, nucleoside, nucleotide and nucleic acid metabolic process |
| 17                                | 24 | 833  | 0.896 | 5.80E-12 | <0.001 | GO:0010468   | regulation of gene expression                                                       |
| 18                                | 21 | 621  | 0.947 | 9.20E-12 | <0.001 | GO:0006355   | regulation of transcription, DNA-dependent                                          |
| 19                                | 22 | 705  | 0.917 | 1.20E-11 | <0.001 | GO:0006351   | transcription, DNA-dependent                                                        |
| 20                                | 22 | 707  | 0.915 | 1.30E-11 | <0.001 | GO:0032774   | RNA biosynthetic process                                                            |
| 21                                | 25 | 1006 | 0.833 | 4.50E-11 | <0.001 | GO:0019222   | regulation of metabolic process                                                     |
| 22                                | 21 | 678  | 0.905 | 4.80E-11 | <0.001 | GO:0051252   | regulation of RNA metabolic process                                                 |
| 23                                | 56 | 5573 | 0.846 | 8.20E-11 | <0.001 | GO:0005488   | binding                                                                             |

|    |    |      |       |          |        |            |                                                                                              |
|----|----|------|-------|----------|--------|------------|----------------------------------------------------------------------------------------------|
| 24 | 24 | 961  | 0.827 | 1.20E-10 | <0.001 | GO:0031323 | regulation of cellular metabolic process                                                     |
| 25 | 34 | 2014 | 0.728 | 1.20E-10 | <0.001 | GO:0003676 | nucleic acid binding                                                                         |
| 26 | 32 | 1783 | 0.738 | 1.30E-10 | <0.001 | GO:0044446 | intracellular organelle part                                                                 |
| 27 | 32 | 1786 | 0.738 | 1.40E-10 | <0.001 | GO:0044422 | organelle part                                                                               |
| 28 | 35 | 2161 | 0.717 | 1.70E-10 | <0.001 | GO:0043283 | biopolymer metabolic process                                                                 |
| 29 | 57 | 5942 | 0.852 | 2.70E-10 | <0.001 | GO:0005623 | cell                                                                                         |
| 30 | 57 | 5942 | 0.852 | 2.70E-10 | <0.001 | GO:0044464 | cell part                                                                                    |
| 31 | 23 | 947  | 0.805 | 5.80E-10 | <0.001 | GO:0043228 | non-membrane-bounded organelle                                                               |
| 32 | 23 | 947  | 0.805 | 5.80E-10 | <0.001 | GO:0043232 | intracellular non-membrane-bounded organelle                                                 |
| 33 | 35 | 2255 | 0.694 | 5.80E-10 | <0.001 | GO:0016043 | cellular component organization and biogenesis                                               |
| 34 | 28 | 1496 | 0.72  | 1.50E-09 | <0.001 | GO:0050794 | regulation of cellular process                                                               |
| 35 | 25 | 1193 | 0.75  | 1.70E-09 | <0.001 | GO:0006996 | organelle organization and biogenesis                                                        |
| 36 | 12 | 217  | 1.111 | 2.30E-09 | <0.001 | GO:0006259 | DNA metabolic process                                                                        |
| 37 | 19 | 673  | 0.845 | 2.40E-09 | <0.001 | GO:0044428 | nuclear part                                                                                 |
| 38 | 14 | 330  | 1     | 2.80E-09 | <0.001 | GO:0006325 | establishment and/or maintenance of chromatin architecture                                   |
| 39 | 19 | 683  | 0.838 | 3.10E-09 | <0.001 | GO:0030528 | transcription regulator activity                                                             |
| 40 | 11 | 177  | 1.159 | 3.40E-09 | <0.001 | GO:0000785 | chromatin                                                                                    |
| 41 | 9  | 103  | 1.309 | 5.10E-09 | <0.001 | GO:0006260 | DNA replication                                                                              |
| 42 | 14 | 363  | 0.956 | 9.60E-09 | <0.001 | GO:0031981 | nuclear lumen                                                                                |
| 43 | 23 | 1097 | 0.733 | 1.00E-08 | <0.001 | GO:0016070 | RNA metabolic process                                                                        |
| 44 | 28 | 1637 | 0.674 | 1.20E-08 | <0.001 | GO:0050789 | regulation of biological process                                                             |
| 45 | 12 | 272  | 1.006 | 2.90E-08 | <0.001 | GO:0005654 | nucleoplasm                                                                                  |
| 46 | 28 | 1732 | 0.645 | 4.10E-08 | <0.001 | GO:0010467 | gene expression                                                                              |
| 47 | 11 | 257  | 0.986 | 1.60E-07 | <0.001 | GO:0044451 | nucleoplasm part                                                                             |
| 48 | 7  | 75   | 1.332 | 1.80E-07 | 0.001  | GO:0045935 | positive regulation of nucleobase, nucleoside, nucleotide and nucleic acid metabolic process |
| 49 | 7  | 75   | 1.332 | 1.80E-07 | 0.001  | GO:0045941 | positive regulation of transcription                                                         |
| 50 | 8  | 115  | 1.197 | 2.30E-07 | 0.001  | GO:0009893 | positive regulation of metabolic process                                                     |
| 51 | 8  | 115  | 1.197 | 2.30E-07 | 0.001  | GO:0031325 | positive regulation of cellular metabolic process                                            |
| 52 | 28 | 1911 | 0.593 | 3.50E-07 | 0.001  | GO:0065007 | biological regulation                                                                        |
| 53 | 6  | 61   | 1.354 | 1.10E-06 | 0.001  | GO:0006261 | DNA-dependent DNA replication                                                                |

|    |    |      |       |          |       |            |                                                             |
|----|----|------|-------|----------|-------|------------|-------------------------------------------------------------|
| 54 | 14 | 535  | 0.775 | 1.20E-06 | 0.001 | GO:0031974 | membrane-enclosed lumen                                     |
| 55 | 14 | 535  | 0.775 | 1.20E-06 | 0.001 | GO:0043233 | organelle lumen                                             |
| 56 | 5  | 34   | 1.55  | 1.20E-06 | 0.001 | GO:0016585 | chromatin remodeling complex                                |
| 57 | 4  | 15   | 1.865 | 1.20E-06 | 0.001 | GO:0006270 | DNA replication initiation                                  |
| 58 | 43 | 4273 | 0.532 | 1.30E-06 | 0.001 | GO:0044238 | primary metabolic process                                   |
| 59 | 5  | 35   | 1.535 | 1.40E-06 | 0.001 | GO:0030261 | chromosome condensation                                     |
| 60 | 10 | 260  | 0.931 | 1.60E-06 | 0.001 | GO:0003702 | RNA polymerase II transcription factor activity             |
| 61 | 8  | 157  | 1.052 | 2.50E-06 | 0.001 | GO:0016568 | chromatin modification                                      |
| 62 | 5  | 40   | 1.469 | 2.70E-06 | 0.001 | GO:0008094 | DNA-dependent ATPase activity                               |
| 63 | 8  | 165  | 1.029 | 3.60E-06 | 0.003 | GO:0006323 | DNA packaging                                               |
| 64 | 11 | 379  | 0.806 | 7.20E-06 | 0.005 | GO:0000278 | mitotic cell cycle                                          |
| 65 | 6  | 87   | 1.186 | 8.70E-06 | 0.005 | GO:0016251 | general RNA polymerase II transcription factor activity     |
| 66 | 3  | 8    | 2.069 | 9.20E-06 | 0.005 | GO:0035060 | brahma complex                                              |
| 67 | 5  | 53   | 1.333 | 1.10E-05 | 0.005 | GO:0045893 | positive regulation of transcription, DNA-dependent         |
| 68 | 5  | 53   | 1.333 | 1.10E-05 | 0.005 | GO:0051254 | positive regulation of RNA metabolic process                |
| 69 | 37 | 3588 | 0.476 | 1.10E-05 | 0.005 | GO:0043170 | macromolecule metabolic process                             |
| 70 | 22 | 1510 | 0.545 | 1.30E-05 | 0.005 | GO:0043234 | protein complex                                             |
| 71 | 4  | 27   | 1.554 | 1.40E-05 | 0.006 | GO:0003678 | DNA helicase activity                                       |
| 72 | 9  | 264  | 0.871 | 1.50E-05 | 0.006 | GO:0006333 | chromatin assembly or disassembly                           |
| 73 | 7  | 154  | 0.996 | 2.30E-05 | 0.009 | GO:0006357 | regulation of transcription from RNA polymerase II promoter |
| 74 | 41 | 4369 | 0.457 | 2.60E-05 | 0.009 | GO:0044237 | cellular metabolic process                                  |
| 75 | 23 | 1704 | 0.512 | 2.60E-05 | 0.01  | GO:0005515 | protein binding                                             |
| 76 | 7  | 158  | 0.984 | 2.70E-05 | 0.012 | GO:0007067 | mitosis                                                     |
| 77 | 7  | 159  | 0.981 | 2.90E-05 | 0.012 | GO:0000087 | M phase of mitotic cell cycle                               |
| 78 | 10 | 361  | 0.78  | 2.90E-05 | 0.012 | GO:0048699 | generation of neurons                                       |
| 79 | 8  | 221  | 0.894 | 3.00E-05 | 0.012 | GO:0048522 | positive regulation of cellular process                     |
| 80 | 5  | 66   | 1.229 | 3.30E-05 | 0.03  | GO:0005700 | polytene chromosome                                         |
| 81 | 8  | 225  | 0.886 | 3.50E-05 | 0.031 | GO:0006366 | transcription from RNA polymerase II promoter               |
| 82 | 10 | 377  | 0.76  | 4.30E-05 | 0.033 | GO:0022008 | neurogenesis                                                |
| 83 | 8  | 238  | 0.861 | 5.20E-05 | 0.036 | GO:0048518 | positive regulation of biological process                   |

| 84                    | 6        | 123      | 1.026      | 6.30E-05 | 0.044        | GO:0006338          | chromatin remodeling                                                                |
|-----------------------|----------|----------|------------|----------|--------------|---------------------|-------------------------------------------------------------------------------------|
| 85                    | 6        | 129      | 1.004      | 8.20E-05 | 0.048        | GO:0016358          | dendrite development                                                                |
| 86                    | 6        | 129      | 1.004      | 8.20E-05 | 0.048        | GO:0048813          | dendrite morphogenesis                                                              |
| <b>TAS-R proteins</b> |          |          |            |          |              |                     |                                                                                     |
| <b>Rank</b>           | <b>N</b> | <b>X</b> | <b>LOD</b> | <b>P</b> | <b>P-adj</b> | <b>GO Attribute</b> |                                                                                     |
| 1                     | 45       | 1698     | 1.265      | 5.60E-26 | <0.001       | GO:0005634          | nucleus                                                                             |
| 2                     | 46       | 2641     | 1.065      | 6.60E-19 | <0.001       | GO:0043231          | intracellular membrane-bounded organelle                                            |
| 3                     | 46       | 2644     | 1.064      | 6.90E-19 | <0.001       | GO:0043227          | membrane-bounded organelle                                                          |
| 4                     | 48       | 3171     | 1.046      | 1.40E-17 | <0.001       | GO:0043229          | intracellular organelle                                                             |
| 5                     | 48       | 3173     | 1.045      | 1.50E-17 | <0.001       | GO:0043226          | organelle                                                                           |
| 6                     | 51       | 4069     | 1.043      | 8.90E-16 | <0.001       | GO:0044424          | intracellular part                                                                  |
| 7                     | 28       | 936      | 1.017      | 1.30E-15 | <0.001       | GO:0003677          | DNA binding                                                                         |
| 8                     | 51       | 4485     | 0.975      | 8.30E-14 | <0.001       | GO:0005622          | intracellular                                                                       |
| 9                     | 10       | 60       | 1.676      | 3.80E-13 | <0.001       | GO:0003682          | chromatin binding                                                                   |
| 10                    | 31       | 1567     | 0.849      | 1.60E-12 | <0.001       | GO:0006139          | nucleobase, nucleoside, nucleotide and nucleic acid metabolic process               |
| 11                    | 23       | 828      | 0.926      | 5.50E-12 | <0.001       | GO:0006350          | transcription                                                                       |
| 12                    | 16       | 339      | 1.111      | 9.00E-12 | <0.001       | GO:0005694          | chromosome                                                                          |
| 13                    | 15       | 290      | 1.146      | 1.20E-11 | <0.001       | GO:0044427          | chromosomal part                                                                    |
| 14                    | 53       | 5573     | 0.939      | 2.70E-11 | <0.001       | GO:0005488          | binding                                                                             |
| 15                    | 17       | 437      | 1.029      | 3.80E-11 | <0.001       | GO:0051276          | chromosome organization and biogenesis                                              |
| 16                    | 21       | 739      | 0.917      | 4.10E-11 | <0.001       | GO:0045449          | regulation of transcription                                                         |
| 17                    | 32       | 2014     | 0.747      | 2.10E-10 | <0.001       | GO:0003676          | nucleic acid binding                                                                |
| 18                    | 21       | 808      | 0.874      | 2.20E-10 | <0.001       | GO:0019219          | regulation of nucleobase, nucleoside, nucleotide and nucleic acid metabolic process |
| 19                    | 21       | 833      | 0.86       | 3.80E-10 | <0.001       | GO:0010468          | regulation of gene expression                                                       |
| 20                    | 33       | 2255     | 0.715      | 8.20E-10 | <0.001       | GO:0016043          | cellular component organization and biogenesis                                      |
| 21                    | 18       | 621      | 0.9        | 1.10E-09 | <0.001       | GO:0006355          | regulation of transcription, DNA-dependent                                          |
| 22                    | 19       | 705      | 0.874      | 1.10E-09 | <0.001       | GO:0006351          | transcription, DNA-dependent                                                        |

|    |    |      |       |          |        |            |                                                                                              |
|----|----|------|-------|----------|--------|------------|----------------------------------------------------------------------------------------------|
| 23 | 19 | 707  | 0.872 | 1.20E-09 | <0.001 | GO:0032774 | RNA biosynthetic process                                                                     |
| 24 | 32 | 2161 | 0.709 | 1.40E-09 | <0.001 | GO:0043283 | biopolymer metabolic process                                                                 |
| 25 | 29 | 1783 | 0.723 | 1.60E-09 | <0.001 | GO:0044446 | intracellular organelle part                                                                 |
| 26 | 29 | 1786 | 0.722 | 1.70E-09 | <0.001 | GO:0044422 | organelle part                                                                               |
| 27 | 22 | 1006 | 0.8   | 1.90E-09 | <0.001 | GO:0019222 | regulation of metabolic process                                                              |
| 28 | 52 | 5942 | 0.812 | 4.00E-09 | <0.001 | GO:0005623 | cell                                                                                         |
| 29 | 52 | 5942 | 0.812 | 4.00E-09 | <0.001 | GO:0044464 | cell part                                                                                    |
| 30 | 18 | 678  | 0.858 | 4.40E-09 | <0.001 | GO:0051252 | regulation of RNA metabolic process                                                          |
| 31 | 21 | 961  | 0.791 | 5.20E-09 | <0.001 | GO:0031323 | regulation of cellular metabolic process                                                     |
| 32 | 23 | 1193 | 0.748 | 8.10E-09 | <0.001 | GO:0006996 | organelle organization and biogenesis                                                        |
| 33 | 12 | 272  | 1.049 | 1.10E-08 | <0.001 | GO:0005654 | nucleoplasm                                                                                  |
| 34 | 10 | 177  | 1.151 | 2.00E-08 | <0.001 | GO:0000785 | chromatin                                                                                    |
| 35 | 20 | 947  | 0.766 | 2.40E-08 | <0.001 | GO:0043228 | non-membrane-bounded organelle                                                               |
| 36 | 20 | 947  | 0.766 | 2.40E-08 | <0.001 | GO:0043232 | intracellular non-membrane-bounded organelle                                                 |
| 37 | 25 | 1496 | 0.696 | 2.50E-08 | <0.001 | GO:0050794 | regulation of cellular process                                                               |
| 38 | 17 | 673  | 0.826 | 2.80E-08 | <0.001 | GO:0044428 | nuclear part                                                                                 |
| 39 | 13 | 363  | 0.959 | 3.00E-08 | <0.001 | GO:0031981 | nuclear lumen                                                                                |
| 40 | 17 | 683  | 0.819 | 3.50E-08 | <0.001 | GO:0030528 | transcription regulator activity                                                             |
| 41 | 8  | 103  | 1.289 | 5.10E-08 | <0.001 | GO:0006260 | DNA replication                                                                              |
| 42 | 11 | 257  | 1.029 | 6.60E-08 | <0.001 | GO:0044451 | nucleoplasm part                                                                             |
| 43 | 12 | 330  | 0.96  | 9.30E-08 | <0.001 | GO:0006325 | establishment and/or maintenance of chromatin architecture                                   |
| 44 | 7  | 75   | 1.372 | 1.00E-07 | <0.001 | GO:0045935 | positive regulation of nucleobase, nucleoside, nucleotide and nucleic acid metabolic process |
| 45 | 7  | 75   | 1.372 | 1.00E-07 | <0.001 | GO:0045941 | positive regulation of transcription                                                         |
| 46 | 8  | 115  | 1.237 | 1.20E-07 | <0.001 | GO:0009893 | positive regulation of metabolic process                                                     |
| 47 | 8  | 115  | 1.237 | 1.20E-07 | <0.001 | GO:0031325 | positive regulation of cellular metabolic process                                            |
| 48 | 10 | 217  | 1.056 | 1.40E-07 | <0.001 | GO:0006259 | DNA metabolic process                                                                        |
| 49 | 25 | 1637 | 0.65  | 1.50E-07 | <0.001 | GO:0050789 | regulation of biological process                                                             |
| 50 | 20 | 1097 | 0.694 | 2.80E-07 | <0.001 | GO:0016070 | RNA metabolic process                                                                        |
| 51 | 25 | 1732 | 0.62  | 4.60E-07 | <0.001 | GO:0010467 | gene expression                                                                              |
| 52 | 5  | 34   | 1.588 | 7.70E-07 | 0.002  | GO:0016585 | chromatin remodeling complex                                                                 |



|    |    |      |       |          |       |            |                                                             |
|----|----|------|-------|----------|-------|------------|-------------------------------------------------------------|
| 53 | 5  | 40   | 1.507 | 1.80E-06 | 0.002 | GO:0008094 | DNA-dependent ATPase activity                               |
| 54 | 40 | 4273 | 0.543 | 2.10E-06 | 0.002 | GO:0044238 | primary metabolic process                                   |
| 55 | 13 | 535  | 0.779 | 2.60E-06 | 0.002 | GO:0031974 | membrane-enclosed lumen                                     |
| 56 | 13 | 535  | 0.779 | 2.60E-06 | 0.002 | GO:0043233 | organelle lumen                                             |
| 57 | 25 | 1911 | 0.569 | 3.00E-06 | 0.003 | GO:0065007 | biological regulation                                       |
| 58 | 23 | 1704 | 0.568 | 5.50E-06 | 0.009 | GO:0005515 | protein binding                                             |
| 59 | 9  | 260  | 0.919 | 6.70E-06 | 0.01  | GO:0003702 | RNA polymerase II transcription factor activity             |
| 60 | 3  | 8    | 2.106 | 7.20E-06 | 0.01  | GO:0035060 | brahma complex                                              |
| 61 | 5  | 53   | 1.371 | 7.40E-06 | 0.01  | GO:0045893 | positive regulation of transcription, DNA-dependent         |
| 62 | 5  | 53   | 1.371 | 7.40E-06 | 0.01  | GO:0051254 | positive regulation of RNA metabolic process                |
| 63 | 4  | 27   | 1.592 | 1.00E-05 | 0.012 | GO:0003678 | DNA helicase activity                                       |
| 64 | 7  | 154  | 1.035 | 1.40E-05 | 0.017 | GO:0006357 | regulation of transcription from RNA polymerase II promoter |
| 65 | 10 | 361  | 0.822 | 1.40E-05 | 0.02  | GO:0048699 | generation of neurons                                       |
| 66 | 5  | 61   | 1.305 | 1.50E-05 | 0.02  | GO:0006261 | DNA-dependent DNA replication                               |
| 67 | 8  | 221  | 0.935 | 1.70E-05 | 0.022 | GO:0048522 | positive regulation of cellular process                     |
| 68 | 8  | 225  | 0.927 | 1.90E-05 | 0.023 | GO:0006366 | transcription from RNA polymerase II promoter               |
| 69 | 10 | 377  | 0.802 | 2.00E-05 | 0.023 | GO:0022008 | neurogenesis                                                |
| 70 | 10 | 379  | 0.8   | 2.10E-05 | 0.023 | GO:0000278 | mitotic cell cycle                                          |
| 71 | 5  | 66   | 1.268 | 2.20E-05 | 0.023 | GO:0005700 | polytene chromosome                                         |
| 72 | 34 | 3588 | 0.472 | 2.80E-05 | 0.033 | GO:0043170 | macromolecule metabolic process                             |
| 73 | 8  | 238  | 0.901 | 2.80E-05 | 0.034 | GO:0048518 | positive regulation of biological process                   |
| 74 | 4  | 35   | 1.464 | 3.00E-05 | 0.034 | GO:0030261 | chromosome condensation                                     |
| 75 | 38 | 4369 | 0.463 | 4.20E-05 | 0.04  | GO:0044237 | cellular metabolic process                                  |
| 76 | 49 | 6671 | 0.527 | 4.80E-05 | 0.04  | GO:0009987 | cellular process                                            |
| 77 | 6  | 129  | 1.043 | 5.10E-05 | 0.042 | GO:0016358 | dendrite development                                        |
| 78 | 6  | 129  | 1.043 | 5.10E-05 | 0.042 | GO:0048813 | dendrite morphogenesis                                      |
| 79 | 3  | 15   | 1.75  | 5.70E-05 | 0.043 | GO:0006270 | DNA replication initiation                                  |
| 80 | 19 | 1449 | 0.523 | 7.60E-05 | 0.049 | GO:0048731 | system development                                          |

**TAS-R-only proteins**

| Rank | N  | X    | LOD   | P        | P-adj  | GO Attribute |                                                                                     |
|------|----|------|-------|----------|--------|--------------|-------------------------------------------------------------------------------------|
| 1    | 21 | 1698 | 1.442 | 2.60E-14 | <0.001 | GO:0005634   | nucleus                                                                             |
| 2    | 22 | 2641 | 1.333 | 1.10E-11 | <0.001 | GO:0043231   | intracellular membrane-bounded organelle                                            |
| 3    | 22 | 2644 | 1.332 | 1.10E-11 | <0.001 | GO:0043227   | membrane-bounded organelle                                                          |
| 4    | 22 | 3171 | 1.225 | 5.10E-10 | <0.001 | GO:0043229   | intracellular organelle                                                             |
| 5    | 22 | 3173 | 1.225 | 5.20E-10 | <0.001 | GO:0043226   | organelle                                                                           |
| 6    | 12 | 828  | 1.079 | 4.30E-08 | <0.001 | GO:0006350   | transcription                                                                       |
| 7    | 22 | 4069 | 1.066 | 9.10E-08 | <0.001 | GO:0044424   | intracellular part                                                                  |
| 8    | 11 | 705  | 1.087 | 9.30E-08 | <0.001 | GO:0006351   | transcription, DNA-dependent                                                        |
| 9    | 11 | 707  | 1.085 | 9.60E-08 | <0.001 | GO:0032774   | RNA biosynthetic process                                                            |
| 10   | 11 | 739  | 1.064 | 1.50E-07 | <0.001 | GO:0045449   | regulation of transcription                                                         |
| 11   | 12 | 936  | 1.02  | 1.70E-07 | <0.001 | GO:0003677   | DNA binding                                                                         |
| 12   | 10 | 621  | 1.077 | 3.30E-07 | <0.001 | GO:0006355   | regulation of transcription, DNA-dependent                                          |
| 13   | 11 | 808  | 1.022 | 3.70E-07 | <0.001 | GO:0019219   | regulation of nucleobase, nucleoside, nucleotide and nucleic acid metabolic process |
| 14   | 11 | 833  | 1.008 | 5.10E-07 | <0.001 | GO:0010468   | regulation of gene expression                                                       |
| 15   | 3  | 8    | 2.508 | 5.20E-07 | <0.001 | GO:0035060   | brahma complex                                                                      |
| 16   | 22 | 4485 | 0.998 | 6.60E-07 | <0.001 | GO:0005622   | intracellular                                                                       |
| 17   | 10 | 678  | 1.036 | 7.50E-07 | <0.001 | GO:0051252   | regulation of RNA metabolic process                                                 |
| 18   | 4  | 34   | 1.892 | 8.00E-07 | <0.001 | GO:0016585   | chromatin remodeling complex                                                        |
| 19   | 14 | 1567 | 0.902 | 8.10E-07 | <0.001 | GO:0006139   | nucleobase, nucleoside, nucleotide and nucleic acid metabolic process               |
| 20   | 11 | 961  | 0.94  | 2.10E-06 | <0.001 | GO:0031323   | regulation of cellular metabolic process                                            |
| 21   | 8  | 437  | 1.093 | 2.70E-06 | <0.001 | GO:0051276   | chromosome organization and biogenesis                                              |
| 22   | 11 | 1006 | 0.918 | 3.30E-06 | 0.001  | GO:0019222   | regulation of metabolic process                                                     |
| 23   | 14 | 1783 | 0.836 | 4.00E-06 | 0.003  | GO:0044446   | intracellular organelle part                                                        |
| 24   | 14 | 1786 | 0.835 | 4.10E-06 | 0.003  | GO:0044422   | organelle part                                                                      |
| 25   | 5  | 115  | 1.437 | 4.30E-06 | 0.004  | GO:0009893   | positive regulation of metabolic process                                            |
| 26   | 5  | 115  | 1.437 | 4.30E-06 | 0.004  | GO:0031325   | positive regulation of cellular metabolic process                                   |
| 27   | 7  | 339  | 1.129 | 5.80E-06 | 0.005  | GO:0005694   | chromosome                                                                          |

|    |    |      |       |          |       |            |                                                                                              |
|----|----|------|-------|----------|-------|------------|----------------------------------------------------------------------------------------------|
| 28 | 9  | 673  | 0.968 | 7.10E-06 | 0.005 | GO:0044428 | nuclear part                                                                                 |
| 29 | 11 | 1097 | 0.876 | 7.80E-06 | 0.005 | GO:0016070 | RNA metabolic process                                                                        |
| 30 | 4  | 60   | 1.623 | 8.10E-06 | 0.005 | GO:0003682 | chromatin binding                                                                            |
| 31 | 7  | 363  | 1.098 | 9.10E-06 | 0.005 | GO:0031981 | nuclear lumen                                                                                |
| 32 | 6  | 257  | 1.169 | 1.50E-05 | 0.008 | GO:0044451 | nucleoplasm part                                                                             |
| 33 | 10 | 947  | 0.878 | 1.50E-05 | 0.008 | GO:0043228 | non-membrane-bounded organelle                                                               |
| 34 | 10 | 947  | 0.878 | 1.50E-05 | 0.008 | GO:0043232 | intracellular non-membrane-bounded organelle                                                 |
| 35 | 4  | 75   | 1.52  | 2.00E-05 | 0.011 | GO:0045935 | positive regulation of nucleobase, nucleoside, nucleotide and nucleic acid metabolic process |
| 36 | 4  | 75   | 1.52  | 2.00E-05 | 0.011 | GO:0045941 | positive regulation of transcription                                                         |
| 37 | 6  | 272  | 1.143 | 2.10E-05 | 0.013 | GO:0005654 | nucleoplasm                                                                                  |
| 38 | 12 | 1496 | 0.791 | 2.50E-05 | 0.015 | GO:0050794 | regulation of cellular process                                                               |
| 39 | 2  | 4    | 2.685 | 2.80E-05 | 0.023 | GO:0000791 | euchromatin                                                                                  |
| 40 | 6  | 290  | 1.114 | 3.00E-05 | 0.023 | GO:0044427 | chromosomal part                                                                             |
| 41 | 5  | 177  | 1.241 | 3.50E-05 | 0.024 | GO:0000785 | chromatin                                                                                    |
| 42 | 14 | 2161 | 0.734 | 4.00E-05 | 0.024 | GO:0043283 | biopolymer metabolic process                                                                 |
| 43 | 22 | 5573 | 0.829 | 4.90E-05 | 0.033 | GO:0005488 | binding                                                                                      |
| 44 | 12 | 1637 | 0.745 | 6.20E-05 | 0.034 | GO:0050789 | regulation of biological process                                                             |
| 45 | 6  | 330  | 1.055 | 6.20E-05 | 0.034 | GO:0006325 | establishment and/or maintenance of chromatin architecture                                   |
| 46 | 14 | 2255 | 0.711 | 6.50E-05 | 0.035 | GO:0016043 | cellular component organization and biogenesis                                               |
| 47 | 13 | 2014 | 0.704 | 9.80E-05 | 0.049 | GO:0003676 | nucleic acid binding                                                                         |
| 48 | 5  | 221  | 1.141 | 0.0001   | 0.049 | GO:0048522 | positive regulation of cellular process                                                      |

### TAS-L proteins

| Rank | N  | X    | LOD   | P        | P-adj  | GO Attribute |                                          |
|------|----|------|-------|----------|--------|--------------|------------------------------------------|
| 1    | 28 | 1698 | 1.158 | 1.80E-15 | <0.001 | GO:0005634   | nucleus                                  |
| 2    | 28 | 2641 | 0.919 | 1.50E-10 | <0.001 | GO:0043231   | intracellular membrane-bounded organelle |
| 3    | 28 | 2644 | 0.919 | 1.60E-10 | <0.001 | GO:0043227   | membrane-bounded organelle               |
| 4    | 30 | 3171 | 0.925 | 2.50E-10 | <0.001 | GO:0043229   | intracellular organelle                  |

|    |    |      |       |          |        |            |                                                                                     |
|----|----|------|-------|----------|--------|------------|-------------------------------------------------------------------------------------|
| 5  | 30 | 3173 | 0.924 | 2.50E-10 | <0.001 | GO:0043226 | organelle                                                                           |
| 6  | 33 | 4069 | 0.971 | 4.00E-10 | <0.001 | GO:0044424 | intracellular part                                                                  |
| 7  | 34 | 4485 | 0.989 | 8.10E-10 | <0.001 | GO:0005622 | intracellular                                                                       |
| 8  | 7  | 60   | 1.688 | 1.00E-09 | <0.001 | GO:0003682 | chromatin binding                                                                   |
| 9  | 11 | 290  | 1.204 | 2.10E-09 | <0.001 | GO:0044427 | chromosomal part                                                                    |
| 10 | 17 | 936  | 0.946 | 2.70E-09 | <0.001 | GO:0003677 | DNA binding                                                                         |
| 11 | 11 | 339  | 1.132 | 1.10E-08 | <0.001 | GO:0005694 | chromosome                                                                          |
| 12 | 20 | 1567 | 0.824 | 2.60E-08 | <0.001 | GO:0006139 | nucleobase, nucleoside, nucleotide and nucleic acid metabolic process               |
| 13 | 9  | 217  | 1.222 | 3.60E-08 | <0.001 | GO:0006259 | DNA metabolic process                                                               |
| 14 | 7  | 103  | 1.431 | 4.80E-08 | <0.001 | GO:0006260 | DNA replication                                                                     |
| 15 | 5  | 35   | 1.773 | 1.10E-07 | 0.001  | GO:0030261 | chromosome condensation                                                             |
| 16 | 11 | 437  | 1.015 | 1.50E-07 | 0.001  | GO:0051276 | chromosome organization and biogenesis                                              |
| 17 | 14 | 828  | 0.867 | 2.80E-07 | 0.001  | GO:0006350 | transcription                                                                       |
| 18 | 21 | 2014 | 0.738 | 3.30E-07 | 0.001  | GO:0003676 | nucleic acid binding                                                                |
| 19 | 13 | 739  | 0.873 | 5.40E-07 | 0.001  | GO:0045449 | regulation of transcription                                                         |
| 20 | 35 | 5942 | 0.863 | 5.80E-07 | 0.001  | GO:0005623 | cell                                                                                |
| 21 | 35 | 5942 | 0.863 | 5.80E-07 | 0.001  | GO:0044464 | cell part                                                                           |
| 22 | 34 | 5573 | 0.82  | 5.90E-07 | 0.001  | GO:0005488 | binding                                                                             |
| 23 | 21 | 2161 | 0.7   | 1.10E-06 | 0.001  | GO:0043283 | biopolymer metabolic process                                                        |
| 24 | 7  | 165  | 1.213 | 1.20E-06 | 0.001  | GO:0006323 | DNA packaging                                                                       |
| 25 | 13 | 808  | 0.831 | 1.50E-06 | 0.001  | GO:0019219 | regulation of nucleobase, nucleoside, nucleotide and nucleic acid metabolic process |
| 26 | 12 | 683  | 0.86  | 1.70E-06 | 0.001  | GO:0030528 | transcription regulator activity                                                    |
| 27 | 13 | 833  | 0.816 | 2.10E-06 | 0.001  | GO:0010468 | regulation of gene expression                                                       |
| 28 | 21 | 2255 | 0.677 | 2.30E-06 | 0.001  | GO:0016043 | cellular component organization and biogenesis                                      |
| 29 | 14 | 1006 | 0.774 | 2.90E-06 | 0.001  | GO:0019222 | regulation of metabolic process                                                     |
| 30 | 15 | 1193 | 0.738 | 4.00E-06 | 0.001  | GO:0006996 | organelle organization and biogenesis                                               |
| 31 | 11 | 621  | 0.852 | 4.70E-06 | 0.001  | GO:0006355 | regulation of transcription, DNA-dependent                                          |
| 32 | 18 | 1783 | 0.67  | 6.50E-06 | 0.001  | GO:0044446 | intracellular organelle part                                                        |
| 33 | 18 | 1786 | 0.669 | 6.70E-06 | 0.001  | GO:0044422 | organelle part                                                                      |
| 34 | 13 | 947  | 0.755 | 8.60E-06 | 0.001  | GO:0043228 | non-membrane-bounded organelle                                                      |

| 35                           | 13       | 947      | 0.755      | 8.60E-06 | 0.001        | GO:0043232          | intracellular non-membrane-bounded organelle               |
|------------------------------|----------|----------|------------|----------|--------------|---------------------|------------------------------------------------------------|
| 36                           | 4        | 40       | 1.595      | 9.80E-06 | 0.001        | GO:0008094          | DNA-dependent ATPase activity                              |
| 37                           | 13       | 961      | 0.748      | 1.00E-05 | 0.001        | GO:0031323          | regulation of cellular metabolic process                   |
| 38                           | 11       | 678      | 0.811      | 1.10E-05 | 0.001        | GO:0051252          | regulation of RNA metabolic process                        |
| 39                           | 8        | 330      | 0.966      | 1.30E-05 | 0.006        | GO:0006325          | establishment and/or maintenance of chromatin architecture |
| 40                           | 16       | 1496     | 0.671      | 1.40E-05 | 0.006        | GO:0050794          | regulation of cellular process                             |
| 41                           | 4        | 44       | 1.55       | 1.40E-05 | 0.007        | GO:0016569          | covalent chromatin modification                            |
| 42                           | 4        | 44       | 1.55       | 1.40E-05 | 0.007        | GO:0016570          | histone modification                                       |
| 43                           | 11       | 705      | 0.792      | 1.60E-05 | 0.008        | GO:0006351          | transcription, DNA-dependent                               |
| 44                           | 11       | 707      | 0.791      | 1.60E-05 | 0.008        | GO:0032774          | RNA biosynthetic process                                   |
| 45                           | 3        | 15       | 1.94       | 1.60E-05 | 0.008        | GO:0006270          | DNA replication initiation                                 |
| 46                           | 6        | 177      | 1.103      | 2.70E-05 | 0.013        | GO:0000785          | chromatin                                                  |
| 47                           | 3        | 20       | 1.794      | 4.00E-05 | 0.04         | GO:0007076          | mitotic chromosome condensation                            |
| 48                           | 16       | 1637     | 0.625      | 4.30E-05 | 0.04         | GO:0050789          | regulation of biological process                           |
| 49                           | 4        | 61       | 1.397      | 5.30E-05 | 0.041        | GO:0006261          | DNA-dependent DNA replication                              |
| 50                           | 27       | 4273     | 0.567      | 5.50E-05 | 0.042        | GO:0044238          | primary metabolic process                                  |
| 51                           | 10       | 673      | 0.759      | 6.40E-05 | 0.043        | GO:0044428          | nuclear part                                               |
| <b>TAS-L-only proteins *</b> |          |          |            |          |              |                     |                                                            |
| <b>Rank</b>                  | <b>N</b> | <b>X</b> | <b>LOD</b> | <b>P</b> | <b>P-adj</b> | <b>GO Attribute</b> |                                                            |
| 1                            | 3        | 7        | 2.786      | 9.60E-08 | <0.001       | GO:0000808          | origin recognition complex                                 |
| 2                            | 3        | 7        | 2.786      | 9.60E-08 | <0.001       | GO:0005664          | nuclear origin of replication recognition complex          |
| 3                            | 6        | 217      | 1.475      | 4.60E-07 | <0.001       | GO:0006259          | DNA metabolic process                                      |
| 4                            | 4        | 47       | 1.939      | 5.80E-07 | <0.001       | GO:0044454          | nuclear chromosome part                                    |
| 5                            | 4        | 51       | 1.901      | 8.10E-07 | <0.001       | GO:0000228          | nuclear chromosome                                         |
| 6                            | 3        | 15       | 2.342      | 1.20E-06 | <0.001       | GO:0006270          | DNA replication initiation                                 |
| 7                            | 10       | 1698     | 0.905      | 3.70E-05 | 0.009        | GO:0005634          | nucleus                                                    |
| 8                            | 12       | 2641     | 0.879      | 4.40E-05 | 0.011        | GO:0043231          | intracellular membrane-bounded organelle                   |

|    |    |      |       |          |       |            |                                      |
|----|----|------|-------|----------|-------|------------|--------------------------------------|
| 9  | 12 | 2644 | 0.879 | 4.40E-05 | 0.013 | GO:0043227 | membrane-bounded organelle           |
| 10 | 5  | 290  | 1.233 | 4.90E-05 | 0.015 | GO:0044427 | chromosomal part                     |
| 11 | 3  | 61   | 1.67  | 9.40E-05 | 0.034 | GO:0006261 | DNA-dependent DNA replication        |
| 12 | 5  | 339  | 1.163 | 0.0001   | 0.035 | GO:0005694 | chromosome                           |
| 13 | 2  | 12   | 2.243 | 0.00014  | 0.05  | GO:0000723 | telomere maintenance                 |
| 14 | 2  | 12   | 2.243 | 0.00014  | 0.05  | GO:0032200 | telomere organization and biogenesis |

\* Includes proteins for which 1 peptide only was detected, because there wasn't a sufficient number of factors with more peptides for term enrichment analysis.

GO analysis performed with the FuncAssociate software (S1).

| Table legend |                                                                                                                                          |
|--------------|------------------------------------------------------------------------------------------------------------------------------------------|
| <b>Rank</b>  | Position in the attribute list ranked by significance of association with query                                                          |
| <b>N</b>     | Number of genes in query with this attribute                                                                                             |
| <b>X</b>     | Number of genes overall with this attribute                                                                                              |
| <b>LOD</b>   | The logarithm (base 10) of the odds ratio; positive and negative values indicate over- and underrepresentation, respectively             |
| <b>P</b>     | Single hypothesis one-sided P-value of the association between attribute and query (based on Fisher's Exact Test)                        |
| <b>P-adj</b> | Adjusted P-value: fraction (as a %) of 1000 null-hypothesis simulations having attributes with this single-hypothesis P value or smaller |

**Table S3:** Proteins common to TAS-L/R in S3, Kc, embryos

| Flybase ID  | CG#     | Name          | Kc    |        |       |        | S3    |        |       |        | Embryo * |
|-------------|---------|---------------|-------|--------|-------|--------|-------|--------|-------|--------|----------|
|             |         |               | TAS-L |        | TAS-R |        | TAS-L |        | TAS-R |        | TAS-R    |
|             |         |               | total | unique | total | unique | total | unique | total | unique | peptides |
| FBgn0037810 | CG12819 | <b>sle</b>    | 32    | 15     | 22    | 15     | 10    | 8      | 2     | 2      | 0        |
| FBgn0002638 | CG10480 | <b>Bj1</b>    | 18    | 9      | 14    | 10     | 5     | 3      | 9     | 7      | 4        |
| FBgn0004584 | CG3178  | <b>Rrp1</b>   | 7     | 7      | 13    | 13     | 7     | 6      | 14    | 9      | 8        |
| FBgn0260991 | CG12165 | <b>Incenp</b> | 28    | 13     | 20    | 9      | 11    | 5      | 1     | 1      | 0        |
| FBgn0043456 | CG4747  |               | 3     | 3      | 17    | 11     | 2     | 1      | 11    | 7      | 0        |
| FBgn0011604 | CG8625  | <b>lswi</b>   | 3     | 2      | 17    | 15     | 2     | 2      | 11    | 8      | 2        |
| FBgn0026170 | CG4494  | <b>smt3</b>   | 17    | 5      | 11    | 4      | 5     | 1      | 1     | 1      | 0        |
| FBgn0030854 | CG8289  |               | 7     | 4      | 7     | 6      | 10    | 6      | 1     | 1      | 3        |
| FBgn0013263 | CG33261 | <b>Trl</b>    | 9     | 3      | 9     | 3      | 3     | 2      | 2     | 1      | 0        |
| FBgn0002780 | CG2050  | <b>mod</b>    | 2     | 2      | 4     | 4      | 5     | 5      | 3     | 3      | 4        |
| FBgn0020255 | CG1404  | <b>ran</b>    | 4     | 3      | 6     | 6      | 1     | 1      | 4     | 4      | 0        |
| FBgn0040268 | CG10123 | <b>Top3α</b>  | 1     | 1      | 3     | 3      | 3     | 3      | 4     | 4      | 0        |
| FBgn0020309 | CG14938 | <b>crol</b>   | 5     | 2      | 7     | 4      | 1     | 1      | 1     | 1      | 0        |
| FBgn0035213 | CG2199  |               | 2     | 1      | 4     | 2      | 3     | 1      | 1     | 1      | 0        |
| FBgn0038608 | CG7670  | <b>WRNexo</b> | 2     | 2      | 4     | 3      | 2     | 2      | 1     | 1      | 0        |
| FBgn0040075 | CG9750  | <b>rept</b>   | 1     | 1      | 5     | 5      | 2     | 2      | 1     | 1      | 3        |
| FBgn0015610 | CG4236  | <b>Caf1</b>   | 2     | 2      | 2     | 2      | 1     | 1      | 2     | 1      | 3        |
| FBgn0035370 | CG1240  |               | 1     | 1      | 2     | 2      | 1     | 1      | 2     | 2      | 0        |
| FBgn0031977 | CG7380  | <b>baf</b>    | 1     | 1      | 1     | 1      | 1     | 1      | 1     | 1      | 0        |
| FBgn0022349 | CG1910  |               | 1     | 1      | 1     | 1      | 1     | 1      | 1     | 1      | 0        |

\* PICh experiment performed on chromatin from 0-24hr old embryos; red background: factors identified as non-specific in Rees et al, 2011; yellow background: no enrichment seen by Western blot.

**Table S4:** TAS-L proteins, ranked by confidence score

| rank | detectable peptides/ 1000 <sup>a</sup> | detectability score <sup>b</sup> | Normalized Gene Expression Score <sup>c</sup> |        | Expression level <sup>d</sup> |        | Confidence score <sup>e</sup> | Flybase ID  | Name        | Kc       |        |          |        | S3 |   |    |   |
|------|----------------------------------------|----------------------------------|-----------------------------------------------|--------|-------------------------------|--------|-------------------------------|-------------|-------------|----------|--------|----------|--------|----|---|----|---|
|      |                                        |                                  | TAS_L                                         |        | TAS_R                         |        |                               |             |             | TAS_L    |        | TAS_R    |        |    |   |    |   |
|      |                                        |                                  | peptides                                      |        | peptides                      |        |                               |             |             | peptides |        | peptides |        |    |   |    |   |
|      |                                        |                                  | total                                         | unique | total                         | unique |                               |             |             | total    | unique | total    | unique |    |   |    |   |
| 1    | 17.54                                  | 3.29                             | 0.89                                          | 1.22   | 726                           | 1072   | 3.92                          | FBgn0039338 | XNP         | 14       | 11     | 6        | 6      | 3  | 3 | 0  | 0 |
| 2    | 14.16                                  | 2.65                             | 1.17                                          | 1.35   | 951                           | 1181   | 3.58                          | FBgn0004584 | Rrp1        | 7        | 7      | 13       | 13     | 7  | 6 | 14 | 9 |
| 3    | 14.37                                  | 2.69                             | 0.19                                          | 0.14   | 155                           | 119    | 3.50                          | FBgn0040465 | Dip3        | 10       | 5      | 1        | 1      | 0  | 0 | 0  | 0 |
| 4    | 20.83                                  | 3.90                             | 0.94                                          | 1.09   | 764                           | 956    | 3.46                          | FBgn0030854 | CG8289      | 7        | 4      | 7        | 6      | 10 | 6 | 1  | 1 |
| 5    | 25.59                                  | 4.79                             | 2.85                                          | 1.55   | 2327                          | 1356   | 3.29                          | FBgn0002638 | Bj1         | 18       | 9      | 14       | 10     | 5  | 3 | 9  | 7 |
| 6    | 15.67                                  | 2.94                             | 0.84                                          | 0.87   | 687                           | 767    | 2.64                          | FBgn0032105 | borr        | 10       | 6      | 3        | 3      | 0  | 0 | 0  | 0 |
| 7    | 9.12                                   | 1.71                             | 0.50                                          | 0.74   | 407                           | 647    | 2.58                          | FBgn0024227 | ial         | 5        | 5      | 1        | 1      | 1  | 1 | 0  | 0 |
| 8    | 12.03                                  | 2.25                             | 3.40                                          | 4.41   | 2774                          | 3868   | 1.95                          | FBgn0013263 | Trl         | 9        | 3      | 9        | 3      | 3  | 2 | 2  | 1 |
| 9    | 20.85                                  | 3.90                             | 0.53                                          | 0.82   | 435                           | 717    | 1.75                          | FBgn0026573 | CG8290      | 8        | 6      | 0        | 0      | 0  | 0 | 0  | 0 |
| 10   | 19.02                                  | 3.56                             | 5.10                                          | 5.03   | 4158                          | 4413   | 1.62                          | FBgn0034961 | CG3163      | 12       | 7      | 2        | 2      | 2  | 1 | 0  | 0 |
| 11   | 33.33                                  | 6.24                             | 9.65                                          | 6.72   | 7873                          | 5894   | 1.52                          | FBgn0026170 | smt3        | 17       | 5      | 11       | 4      | 5  | 1 | 1  | 1 |
| 12   | 9.36                                   | 1.75                             | 4.45                                          | 3.59   | 3629                          | 3149   | 1.04                          | FBgn0020309 | crol        | 5        | 2      | 7        | 4      | 1  | 1 | 1  | 1 |
| 13   | 17.70                                  | 3.31                             | 0.29                                          | 1.49   | 239                           | 1305   | 0.95                          | FBgn0030418 | CG4004      | 4        | 1      | 1        | 1      | 0  | 0 | 0  | 0 |
| 14   | 12.94                                  | 2.42                             | 0.34                                          | 0.37   | 277                           | 323    | 0.72                          | FBgn0015270 | Orc2        | 2        | 2      | 0        | 0      | 0  | 0 | 0  | 0 |
| 15   | 28.47                                  | 5.33                             | 1.87                                          | 0.92   | 1525                          | 806    | 0.59                          | FBgn0064122 | CG33691     | 3        | 1      | 2        | 1      | 1  | 1 | 0  | 0 |
| 16   | 11.27                                  | 2.11                             | 2.81                                          | 3.09   | 2294                          | 2710   | 0.59                          | FBgn0000412 | D1          | 0        | 0      | 4        | 3      | 3  | 2 | 3  | 3 |
| 17   | 19.16                                  | 3.59                             | 1.44                                          | 2.00   | 1171                          | 1754   | 0.57                          | FBgn0013591 | Mi-2        | 0        | 0      | 5        | 4      | 3  | 3 | 3  | 3 |
| 18   | 16.28                                  | 3.05                             | 2.49                                          | 2.63   | 2029                          | 2302   | 0.54                          | FBgn0015610 | Caf1        | 2        | 2      | 2        | 2      | 1  | 1 | 2  | 1 |
| 19   | 25.94                                  | 4.86                             | 5.10                                          | 5.03   | 4158                          | 4413   | 0.50                          | FBgn0027381 | GAG         | 3        | 3      | 4        | 4      | 2  | 2 | 0  | 0 |
| 20   | 25.93                                  | 4.86                             | 1.08                                          | 1.20   | 885                           | 1050   | 0.50                          | FBgn0014861 | Mcm2        | 3        | 2      | 1        | 1      | 0  | 0 | 0  | 0 |
| 21   | 4.10                                   | 0.77                             | 3.23                                          | 3.40   | 2634                          | 2981   | 0.49                          | FBgn0035370 | CG1240      | 1        | 1      | 2        | 2      | 1  | 1 | 2  | 2 |
| 22   | 19.53                                  | 3.66                             | 0.67                                          | 0.56   | 549                           | 489    | 0.47                          | FBgn0002872 | mu2         | 2        | 2      | 0        | 0      | 0  | 0 | 0  | 0 |
| 23   | 12.22                                  | 2.29                             | 1.46                                          | 2.61   | 1189                          | 2289   | 0.46                          | FBgn0004399 | psq         | 0        | 0      | 0        | 0      | 2  | 2 | 1  | 1 |
| 24   | 21.88                                  | 4.10                             | 2.15                                          | 2.66   | 1755                          | 2332   | 0.46                          | FBgn0003612 | Su(var)2-10 | 3        | 2      | 2        | 2      | 0  | 0 | 0  | 0 |
| 25   | 32.39                                  | 6.07                             | 0.87                                          | 1.00   | 710                           | 877    | 0.43                          | FBgn0034657 | LBR         | 3        | 2      | 6        | 3      | 0  | 0 | 2  | 2 |



|    |       |       |       |      |      |      |      |             |                |   |   |   |   |   |   |   |   |
|----|-------|-------|-------|------|------|------|------|-------------|----------------|---|---|---|---|---|---|---|---|
| 26 | 20.83 | 3.90  | 0.51  | 1.06 | 413  | 929  | 0.43 | FBgn0033609 | fbl6           | 0 | 0 | 0 | 0 | 2 | 2 | 1 | 1 |
| 27 | 17.32 | 3.24  | 7.55  | 5.47 | 6159 | 4797 | 0.41 | FBgn0003600 | Su(var)3-9     | 4 | 4 | 0 | 0 | 0 | 0 | 0 | 0 |
| 28 | 27.78 | 5.20  | 10.00 | 6.31 | 8160 | 5529 | 0.37 | FBgn0020255 | ran            | 4 | 3 | 6 | 6 | 1 | 1 | 4 | 4 |
| 29 | 22.49 | 4.21  | 1.85  | 6.03 | 1513 | 5287 | 0.37 | FBgn0022349 | CG1910         | 1 | 1 | 1 | 1 | 2 | 1 | 2 | 1 |
| 30 | 14.66 | 2.75  | 3.19  | 3.00 | 2605 | 2629 | 0.34 | FBgn0004925 | eIF-2 $\alpha$ | 2 | 2 | 1 | 1 | 0 | 0 | 0 | 0 |
| 31 | 27.78 | 5.20  | 1.04  | 1.22 | 847  | 1071 | 0.32 | FBgn0020633 | Mcm7           | 2 | 2 | 1 | 1 | 0 | 0 | 0 | 0 |
| 32 | 31.10 | 5.82  | 1.45  | 1.64 | 1185 | 1441 | 0.27 | FBgn0032988 | Tif-IA         | 1 | 1 | 0 | 0 | 1 | 1 | 0 | 0 |
| 33 | 25.45 | 4.77  | 5.37  | 8.18 | 4380 | 7170 | 0.26 | FBgn0000566 | Eip55E         | 3 | 3 | 1 | 1 | 0 | 0 | 0 | 0 |
| 34 | 20.05 | 3.75  | 0.83  | 0.50 | 674  | 440  | 0.23 | FBgn0037719 | bocksbeutel    | 0 | 0 | 2 | 2 | 1 | 1 | 0 | 0 |
| 35 | 21.05 | 3.94  | 0.55  | 1.10 | 452  | 966  | 0.21 | FBgn0039743 | CG7946         | 0 | 0 | 0 | 0 | 1 | 1 | 5 | 4 |
| 36 | 44.44 | 8.32  | 2.62  | 1.70 | 2135 | 1487 | 0.19 | FBgn0031977 | baf            | 1 | 1 | 1 | 1 | 1 | 1 | 1 | 1 |
| 37 | 24.37 | 4.56  | 1.99  | 0.03 | 1624 | 29   | 0.18 | FBgn0045852 | ham            | 1 | 1 | 2 | 1 | 0 | 0 | 0 | 0 |
| 38 | 18.47 | 3.46  | 2.30  | 2.68 | 1880 | 2353 | 0.17 | FBgn0011703 | RnrL           | 1 | 1 | 2 | 1 | 0 | 0 | 0 | 0 |
| 39 | 13.45 | 2.52  | 2.00  | 5.44 | 1630 | 4769 | 0.16 | FBgn0026533 | Dek            | 0 | 0 | 1 | 1 | 1 | 1 | 2 | 1 |
| 40 | 26.80 | 5.02  | 1.16  | 1.31 | 950  | 1148 | 0.16 | FBgn0015664 | Dref           | 1 | 1 | 4 | 4 | 0 | 0 | 2 | 1 |
| 41 | 33.71 | 6.31  | 0.49  | 0.46 | 398  | 400  | 0.15 | FBgn0028700 | RfC38          | 0 | 0 | 5 | 5 | 1 | 1 | 2 | 2 |
| 42 | 26.65 | 4.99  | 1.66  | 2.09 | 1351 | 1834 | 0.15 | FBgn0033039 | gp210          | 1 | 1 | 4 | 4 | 0 | 0 | 2 | 2 |
| 43 | 9.49  | 1.78  | 3.47  | 6.94 | 2829 | 6083 | 0.14 | FBgn0003507 | srp            | 1 | 1 | 2 | 1 | 0 | 0 | 0 | 0 |
| 44 | 15.76 | 2.95  | 5.07  | 4.22 | 4139 | 3701 | 0.13 | FBgn0000289 | cg             | 0 | 0 | 2 | 2 | 1 | 1 | 0 | 0 |
| 45 | 53.76 | 10.07 | 1.49  | 9.26 | 1217 | 8122 | 0.06 | FBgn0001224 | Hsp23          | 0 | 0 | 0 | 0 | 1 | 1 | 3 | 3 |
| 46 | 43.27 | 8.10  | 9.64  | 5.89 | 7866 | 5163 | 0.06 | FBgn0051363 | Jupiter        | 1 | 1 | 2 | 2 | 0 | 0 | 0 | 0 |

a. Detectable Peptides calculated using the Peptide detectability predictor at

<http://darwin.informatics.indiana.edu/applications/PeptideDetectabilityPredictor/> (Tang et al, 2006). The values

presented are for the number of peptides with a detectability >0.6; **b.** the Detectability Score is the number of detectable peptides/1000 normalized to a scale of 0-10, where 10 is the value found for the protein with the highest detectable peptides/1000 (Hsp23, 53.76); **c.** the Normalized Gene Expression Score is the relative gene expression, on a scale of 0-10, where 10 is the value of the highest expressing gene in the respective cell line (Kc: ran, 8160; S3: cpr, 8796); **d.**

expression data obtained from the modENCODE database (Celniker et al, 2009); **e.** the Confidence Score is the value resulting from the division of the number of peptides detected in both cell lines by the sum of the Detectability Score and the average of the Normalized Gene Expression Scores from the 2 cell lines; **Red font:** expression levels not available; attributed average expression level of all factors detected.

**Table S5:** TAS-R proteins, ranked by confidence score

| rank | detectable peptides/ 1000 <sup>a</sup> | detectability score <sup>b</sup> | Normalized Gene Expression Score <sup>c</sup> |      | Expression level <sup>d</sup> |      | Confidence score <sup>e</sup> | Flybase ID  | Name   | Kc       |        |          |        | S3       |        |          |        |
|------|----------------------------------------|----------------------------------|-----------------------------------------------|------|-------------------------------|------|-------------------------------|-------------|--------|----------|--------|----------|--------|----------|--------|----------|--------|
|      |                                        |                                  |                                               |      |                               |      |                               |             |        | TAS_L    |        | TAS_R    |        | TAS_L    |        | TAS_R    |        |
|      |                                        |                                  |                                               |      |                               |      |                               |             |        | peptides |        | peptides |        | peptides |        | peptides |        |
|      |                                        |                                  | Kc                                            | S3   | Kc                            | S3   |                               |             |        | total    | unique | total    | unique | total    | unique | total    | unique |
| 1    | 14.16                                  | 2.65                             | 1.17                                          | 1.35 | 951                           | 1181 | 6.91                          | FBgn0004584 | Rrp1   | 7        | 7      | 13       | 13     | 7        | 6      | 14       | 9      |
| 2    | 25.59                                  | 4.79                             | 2.85                                          | 1.55 | 2327                          | 1356 | 3.29                          | FBgn0002638 | Bj1    | 18       | 9      | 14       | 10     | 5        | 3      | 9        | 7      |
| 3    | 32.89                                  | 6.16                             | 0.79                                          | 1.13 | 641                           | 991  | 1.83                          | FBgn0040078 | pont   | 0        | 0      | 6        | 5      | 0        | 0      | 7        | 5      |
| 4    | 12.03                                  | 2.25                             | 3.40                                          | 4.41 | 2774                          | 3868 | 1.79                          | FBgn0013263 | Trl    | 9        | 3      | 9        | 3      | 3        | 2      | 2        | 1      |
| 5    | 8.78                                   | 1.65                             | 0.61                                          | 0.71 | 498                           | 626  | 1.73                          | FBgn0034878 | pita   | 0        | 0      | 2        | 1      | 0        | 0      | 2        | 1      |
| 6    | 20.83                                  | 3.90                             | 0.94                                          | 1.09 | 764                           | 956  | 1.63                          | FBgn0030854 | CG8289 | 7        | 4      | 7        | 6      | 10       | 6      | 1        | 1      |
| 7    | 19.16                                  | 3.59                             | 1.44                                          | 2.00 | 1171                          | 1754 | 1.51                          | FBgn0013591 | Mi-2   | 0        | 0      | 5        | 4      | 3        | 3      | 3        | 3      |
| 8    | 9.36                                   | 1.75                             | 4.45                                          | 3.59 | 3629                          | 3149 | 1.39                          | FBgn0020309 | crol   | 5        | 2      | 7        | 4      | 1        | 1      | 1        | 1      |
| 9    | 11.27                                  | 2.11                             | 2.81                                          | 3.09 | 2294                          | 2710 | 1.38                          | FBgn0000412 | D1     | 0        | 0      | 4        | 3      | 3        | 2      | 3        | 3      |
| 10   | 17.54                                  | 3.29                             | 0.89                                          | 1.22 | 726                           | 1072 | 1.38                          | FBgn0039338 | XNP    | 14       | 11     | 6        | 6      | 3        | 3      | 0        | 0      |
| 11   | 32.39                                  | 6.07                             | 0.87                                          | 1.00 | 710                           | 877  | 1.14                          | FBgn0034657 | LBR    | 3        | 2      | 6        | 3      | 0        | 0      | 2        | 2      |
| 12   | 20.08                                  | 3.76                             | 0.92                                          | 2.17 | 753                           | 1906 | 1.13                          | FBgn0259785 | pzg    | 0        | 0      | 4        | 4      | 0        | 0      | 2        | 2      |
| 13   | 21.05                                  | 3.94                             | 0.55                                          | 1.10 | 452                           | 966  | 1.05                          | FBgn0039743 | CG7946 | 0        | 0      | 0        | 0      | 1        | 1      | 5        | 4      |
| 14   | 16.54                                  | 3.10                             | 0.95                                          | 2.41 | 778                           | 2115 | 1.05                          | FBgn0002783 | mor    | 0        | 0      | 5        | 4      | 0        | 0      | 0        | 0      |
| 15   | 33.71                                  | 6.31                             | 0.49                                          | 0.46 | 398                           | 400  | 1.03                          | FBgn0028700 | RfC38  | 0        | 0      | 5        | 5      | 1        | 1      | 2        | 2      |
| 16   | 22.30                                  | 4.18                             | 0.71                                          | 0.88 | 581                           | 769  | 1.01                          | FBgn0037659 | Kdm2   | 0        | 0      | 2        | 2      | 0        | 0      | 3        | 2      |
| 17   | 4.10                                   | 0.77                             | 3.23                                          | 3.40 | 2634                          | 2981 | 0.98                          | FBgn0035370 | CG1240 | 1        | 1      | 2        | 2      | 1        | 1      | 2        | 2      |
| 18   | 26.80                                  | 5.02                             | 1.16                                          | 1.31 | 950                           | 1148 | 0.96                          | FBgn0015664 | Dref   | 1        | 1      | 4        | 4      | 0        | 0      | 2        | 1      |
| 19   | 16.20                                  | 3.03                             | 1.74                                          | 2.87 | 1421                          | 2515 | 0.94                          | FBgn0044324 | Chro   | 0        | 0      | 2        | 2      | 0        | 0      | 3        | 2      |
| 20   | 8.44                                   | 1.58                             | 0.67                                          | 0.53 | 547                           | 465  | 0.92                          | FBgn0039019 | HP1c   | 0        | 0      | 2        | 2      | 0        | 0      | 0        | 0      |
| 21   | 26.65                                  | 4.99                             | 1.66                                          | 2.09 | 1351                          | 1834 | 0.87                          | FBgn0033039 | gp210  | 1        | 1      | 4        | 4      | 0        | 0      | 2        | 2      |
| 22   | 33.33                                  | 6.24                             | 9.65                                          | 6.72 | 7873                          | 5894 | 0.83                          | FBgn0026170 | smt3   | 17       | 5      | 11       | 4      | 5        | 1      | 1        | 1      |
| 23   | 26.94                                  | 5.05                             | 0.73                                          | 1.31 | 599                           | 1150 | 0.82                          | FBgn0001994 | crp    | 0        | 0      | 5        | 3      | 0        | 0      | 0        | 0      |
| 24   | 15.67                                  | 2.94                             | 0.84                                          | 0.87 | 687                           | 767  | 0.79                          | FBgn0032105 | borr   | 10       | 6      | 3        | 3      | 0        | 0      | 0        | 0      |
| 25   | 27.42                                  | 5.14                             | 2.39                                          | 2.70 | 1953                          | 2369 | 0.78                          | FBgn0031057 | Ubqn   | 0        | 0      | 6        | 5      | 0        | 0      | 0        | 0      |

|    |       |      |       |       |      |      |      |             |             |    |   |   |   |   |   |   |   |
|----|-------|------|-------|-------|------|------|------|-------------|-------------|----|---|---|---|---|---|---|---|
| 26 | 27.78 | 5.20 | 10.00 | 6.31  | 8160 | 5529 | 0.75 | FBgn0020255 | ran         | 4  | 3 | 6 | 6 | 1 | 1 | 4 | 4 |
| 27 | 18.98 | 3.55 | 0.43  | 0.79  | 347  | 696  | 0.72 | FBgn0011606 | Klp3A       | 0  | 0 | 1 | 1 | 0 | 0 | 2 | 2 |
| 28 | 24.73 | 4.63 | 0.88  | 1.00  | 717  | 873  | 0.72 | FBgn0015602 | BEAF-32     | 0  | 0 | 4 | 3 | 0 | 0 | 0 | 0 |
| 29 | 16.28 | 3.05 | 2.49  | 2.63  | 2029 | 2302 | 0.71 | FBgn0015610 | Caf1        | 2  | 2 | 2 | 2 | 1 | 1 | 2 | 1 |
| 30 | 18.25 | 3.42 | 1.09  | 2.36  | 892  | 2070 | 0.58 | FBgn0000283 | Cp190       | 0  | 0 | 0 | 0 | 0 | 0 | 3 | 3 |
| 31 | 25.04 | 4.69 | 2.18  | 10.03 | 1782 | 8796 | 0.56 | FBgn0015623 | Cpr         | 0  | 0 | 1 | 1 | 0 | 0 | 5 | 4 |
| 32 | 21.13 | 3.96 | 1.64  | 1.43  | 1336 | 1254 | 0.55 | FBgn0010247 | Parp        | 0  | 0 | 1 | 1 | 0 | 0 | 2 | 2 |
| 33 | 15.27 | 2.86 | 0.82  | 0.97  | 667  | 851  | 0.53 | FBgn0000054 | Adf1        | 0  | 0 | 2 | 2 | 0 | 0 | 0 | 0 |
| 34 | 10.68 | 2.00 | 1.60  | 2.36  | 1305 | 2066 | 0.50 | FBgn0003013 | osa         | 0  | 0 | 2 | 2 | 0 | 0 | 0 | 0 |
| 35 | 13.45 | 2.52 | 2.00  | 5.44  | 1630 | 4769 | 0.48 | FBgn0026533 | Dek         | 0  | 0 | 1 | 1 | 1 | 1 | 2 | 1 |
| 36 | 19.48 | 3.65 | 0.56  | 0.68  | 459  | 600  | 0.47 | FBgn0022772 | Orc1        | 0  | 0 | 2 | 1 | 0 | 0 | 0 | 0 |
| 37 | 16.67 | 3.12 | 1.22  | 1.16  | 992  | 1019 | 0.46 | FBgn0030082 | HP1b        | 0  | 0 | 1 | 1 | 0 | 0 | 1 | 1 |
| 38 | 19.05 | 3.57 | 0.56  | 0.93  | 459  | 813  | 0.46 | FBgn0033571 | CG11979     | 0  | 0 | 2 | 2 | 0 | 0 | 0 | 0 |
| 39 | 20.05 | 3.75 | 0.83  | 0.50  | 674  | 440  | 0.45 | FBgn0037719 | bocksbeutel | 0  | 0 | 2 | 2 | 1 | 1 | 0 | 0 |
| 40 | 23.11 | 4.33 | 3.15  | 1.93  | 2571 | 1692 | 0.44 | FBgn0026401 | Nipped-B    | 0  | 0 | 3 | 3 | 0 | 0 | 0 | 0 |
| 41 | 9.12  | 1.71 | 0.50  | 0.74  | 407  | 647  | 0.43 | FBgn0024227 | ial         | 5  | 5 | 1 | 1 | 1 | 1 | 0 | 0 |
| 42 | 21.31 | 3.99 | 0.89  | 0.99  | 723  | 864  | 0.41 | FBgn0086855 | CG17078     | 0  | 0 | 1 | 1 | 0 | 0 | 1 | 1 |
| 43 | 25.94 | 4.86 | 5.10  | 5.03  | 4158 | 4413 | 0.40 | FBgn0027381 | GAG         | 3  | 3 | 4 | 4 | 2 | 2 | 0 | 0 |
| 44 | 22.49 | 4.21 | 1.85  | 6.03  | 1513 | 5287 | 0.37 | FBgn0022349 | CG1910      | 1  | 1 | 1 | 1 | 2 | 1 | 2 | 1 |
| 45 | 24.37 | 4.56 | 1.99  | 0.03  | 1624 | 29   | 0.36 | FBgn0045852 | ham         | 1  | 1 | 2 | 1 | 0 | 0 | 0 | 0 |
| 46 | 14.37 | 2.69 | 0.19  | 0.14  | 155  | 119  | 0.35 | FBgn0040465 | Dip3        | 10 | 5 | 1 | 1 | 0 | 0 | 0 | 0 |
| 47 | 24.93 | 4.67 | 0.99  | 1.18  | 810  | 1037 | 0.35 | FBgn0040066 | wds         | 0  | 0 | 1 | 1 | 0 | 0 | 1 | 1 |
| 48 | 23.17 | 4.34 | 0.91  | 1.93  | 743  | 1690 | 0.35 | FBgn0022720 | zf30C       | 0  | 0 | 2 | 2 | 0 | 0 | 0 | 0 |
| 49 | 27.03 | 5.06 | 0.66  | 0.76  | 535  | 662  | 0.35 | FBgn0011715 | Snr1        | 0  | 0 | 2 | 1 | 0 | 0 | 0 | 0 |
| 50 | 18.47 | 3.46 | 2.30  | 2.68  | 1880 | 2353 | 0.34 | FBgn0011703 | RnrL        | 1  | 1 | 2 | 1 | 0 | 0 | 0 | 0 |
| 51 | 29.44 | 5.51 | 0.54  | 0.66  | 437  | 583  | 0.33 | FBgn0029798 | CG4078      | 0  | 0 | 2 | 2 | 0 | 0 | 0 | 0 |
| 52 | 20.37 | 3.81 | 1.57  | 3.78  | 1284 | 3312 | 0.31 | FBgn0022764 | Sin3A       | 0  | 0 | 1 | 1 | 0 | 0 | 1 | 1 |
| 53 | 21.88 | 4.10 | 2.15  | 2.66  | 1755 | 2332 | 0.31 | FBgn0003612 | Su(var)2-10 | 3  | 2 | 2 | 2 | 0 | 0 | 0 | 0 |
| 54 | 28.47 | 5.33 | 1.87  | 0.92  | 1525 | 806  | 0.30 | FBgn0064122 | CG33691     | 3  | 1 | 2 | 1 | 1 | 1 | 0 | 0 |
| 55 | 30.30 | 5.67 | 0.77  | 1.67  | 632  | 1461 | 0.29 | FBgn0004106 | cdc2        | 0  | 0 | 2 | 2 | 0 | 0 | 0 | 0 |
| 56 | 9.49  | 1.78 | 3.47  | 6.94  | 2829 | 6083 | 0.29 | FBgn0003507 | srp         | 1  | 1 | 2 | 1 | 0 | 0 | 0 | 0 |
| 57 | 15.76 | 2.95 | 5.07  | 4.22  | 4139 | 3701 | 0.26 | FBgn0000289 | cg          | 0  | 0 | 2 | 2 | 1 | 1 | 0 | 0 |
| 58 | 17.70 | 3.31 | 0.29  | 1.49  | 239  | 1305 | 0.24 | FBgn0030418 | CG4004      | 4  | 1 | 1 | 1 | 0 | 0 | 0 | 0 |
| 59 | 19.02 | 3.56 | 5.10  | 5.03  | 4158 | 4413 | 0.23 | FBgn0034961 | CG3163      | 12 | 7 | 2 | 2 | 2 | 1 | 0 | 0 |
| 60 | 12.22 | 2.29 | 1.46  | 2.61  | 1189 | 2289 | 0.23 | FBgn0004399 | psq         | 0  | 0 | 0 | 0 | 2 | 2 | 1 | 1 |

|           |       |       |      |      |      |      |      |             |                                 |   |   |   |   |   |   |   |   |
|-----------|-------|-------|------|------|------|------|------|-------------|---------------------------------|---|---|---|---|---|---|---|---|
| <b>61</b> | 20.83 | 3.90  | 0.51 | 1.06 | 413  | 929  | 0.21 | FBgn0033609 | <b>fbl6</b>                     | 0 | 0 | 0 | 0 | 2 | 2 | 1 | 1 |
| <b>62</b> | 53.76 | 10.07 | 1.49 | 9.26 | 1217 | 8122 | 0.19 | FBgn0001224 | <b>Hsp23</b>                    | 0 | 0 | 0 | 0 | 1 | 1 | 3 | 3 |
| <b>63</b> | 44.44 | 8.32  | 2.62 | 1.70 | 2135 | 1487 | 0.19 | FBgn0031977 | <b>baf</b>                      | 1 | 1 | 1 | 1 | 1 | 1 | 1 | 1 |
| <b>64</b> | 30.65 | 5.74  | 7.54 | 4.23 | 6154 | 3707 | 0.17 | FBgn0011823 | <b>Pen</b>                      | 0 | 0 | 2 | 2 | 0 | 0 | 0 | 0 |
| <b>65</b> | 14.66 | 2.75  | 3.19 | 3.00 | 2605 | 2629 | 0.17 | FBgn0004925 | <b>eIF-2<math>\alpha</math></b> | 2 | 2 | 1 | 1 | 0 | 0 | 0 | 0 |
| <b>66</b> | 25.93 | 4.86  | 1.08 | 1.20 | 885  | 1050 | 0.17 | FBgn0014861 | <b>Mcm2</b>                     | 3 | 2 | 1 | 1 | 0 | 0 | 0 | 0 |
| <b>67</b> | 27.78 | 5.20  | 1.04 | 1.22 | 847  | 1071 | 0.16 | FBgn0020633 | <b>Mcm7</b>                     | 2 | 2 | 1 | 1 | 0 | 0 | 0 | 0 |
| <b>68</b> | 43.27 | 8.10  | 9.64 | 5.89 | 7866 | 5163 | 0.13 | FBgn0051363 | <b>Jupiter</b>                  | 1 | 1 | 2 | 2 | 0 | 0 | 0 | 0 |
| <b>69</b> | 25.45 | 4.77  | 5.37 | 8.18 | 4380 | 7170 | 0.09 | FBgn0000566 | <b>Eip55E</b>                   | 3 | 3 | 1 | 1 | 0 | 0 | 0 | 0 |

**a.** Detectable Peptides calculated using the Peptide detectability predictor at

<http://darwin.informatics.indiana.edu/applications/PeptideDetectabilityPredictor/> (Tang et al, 2006). The values

presented are for the number of peptides with a detectability >0.6; **b.** the Detectability Score is the number of detectable

peptides/1000 normalized to a scale of 0-10, where 10 is the value found for the protein with the highest detectable

peptides/1000 (Hsp23, 53.76); **c.** the Normalized Gene Expression Score is the relative gene expression, on a scale of

0-10, where 10 is the value of the highest expressing gene in the respective cell line (Kc: ran, 8160; S3: cpr, 8796); **d.**

expression data obtained from the modENCODE database (Celniker et al, 2009); **e.** the Confidence Score is the value

resulting from the division of the number of peptides detected in both cell lines by the sum of the Detectability Score and

the average of the Normalized Gene Expression Scores from the 2 cell lines; **Red font:** expression levels not available;

attributed average expression level of all factors detected.

**Table S6:** Eye color phenotypes.

| Gene           | Allele              | Eye color<br>M26; C62 <sup>a</sup> | Eye color<br>+; C62 <sup>b</sup> | Interpretation               |
|----------------|---------------------|------------------------------------|----------------------------------|------------------------------|
| + <sup>c</sup> | +                   | + red                              | + orange                         | Negative control             |
| "              | <i>Df(3R)BSC497</i> | + red<br>Ubx red                   | + brown<br>Ubx dark orange       | Negative                     |
| "              | <i>Df(3R)BSC739</i> | + orange<br>Ubx orange             | + brown<br>Ubx orange            | Mutant not on III            |
| <i>woc</i>     | <i>Df(3R)D605</i>   | + orange<br>Ubx orange             | + orange<br>Ubx orange           | Mutant not on III            |
| <i>mod</i>     | 07570               | + bright red<br>Ubx red            | + red<br>Ubx brown               | Su(TPE) <sup>e</sup>         |
| "              | <i>Df(3R)04661</i>  | + bright red<br>Ubx red            | + red<br>Ubx dark orange         | Su(TPE) <sup>e</sup>         |
| <i>WRNexo</i>  | <i>Df(3R)Cha7</i>   | + dark orange<br>Ubx red           | + dark orange<br>Ubx red         | Mutant, but too weak to map. |
| <i>sle</i>     | 057                 | + red<br>Ubx red                   | + ND <sup>d</sup><br>Ubx ND      | Negative                     |
| <i>brm</i>     | 2                   | + orange<br>Ubx red                | + orange<br>Ubx red              | Mutant on III                |
| <i>SMC1</i>    | <i>exc46</i>        | + red<br>Ubx red                   | + ND<br>Ubx ND                   | Negative                     |
| <i>su(Hw)</i>  | 3                   | + red<br>Ubx red                   | + ND<br>Ubx ND                   | Negative                     |
| <i>rept</i>    | 6945                | + red<br>Ubx red                   | + ND<br>Ubx ND                   | Negative                     |
| <i>CG2199</i>  | <i>Df(3L)Ar14-8</i> | + red<br>Ubx red                   | + ND<br>Ubx ND                   | Negative                     |
| "              | <i>Df(3L)BSC289</i> | + red<br>Ubx red                   | + ND<br>Ubx ND                   | Negative                     |
| <i>Snr1</i>    | 01319               | + red<br>Ubx red                   | + ND<br>Ubx ND                   | Negative                     |
| <i>osa</i>     | 00090               | + red<br>Ubx red                   | + ND<br>Ubx ND                   | Negative                     |
| <i>mor</i>     | <i>Df(3R)Po4</i>    | + dark red<br>Ubx red              | + orange<br>Ubx dark orange      | Mutant, but too weak to map. |
| <i>CAF1</i>    | <i>Df(3R)BSC471</i> | + red<br>Ubx red                   | + red<br>Ubx dark red            | Negative                     |
| <i>borr</i>    | <i>Df(2L)TE30Cb</i> | + red<br>Cy red                    | + ND<br>Ubx ND                   | Negative                     |
| <i>Bj1</i>     | <i>Df(3L)XAS96</i>  | + red<br>Ubx red                   | + orange<br>Ubx brown            | Negative                     |
| <i>XNP</i>     | 1                   | + red<br>Ubx red                   | + ND<br>Ubx ND                   | Negative                     |
| "              | UY3132              | + dark orange<br>Ubx dark orange   | + ND<br>Ubx ND                   | Mutant not on III            |
| <i>CG1240</i>  | <i>Df(3L)BSC119</i> | + red<br>Ubx red                   | + ND<br>Ubx ND                   | Negative                     |

|             |                     |          |                       |          |          |                                               |
|-------------|---------------------|----------|-----------------------|----------|----------|-----------------------------------------------|
| <i>crol</i> | 04418               | +<br>Cy  | orange<br>dark orange | +<br>Ubx | ND<br>ND | Mutant not on II                              |
| "           | <i>Df(2L)BSC243</i> | +<br>Cy  | red<br>red            | +<br>Ubx | ND<br>ND | Negative                                      |
| <i>Trl</i>  | <i>Df(3L)fz-M21</i> | +<br>Ubx | brown<br>red          | +<br>Ubx | ND<br>ND | Mutant on III;<br>False positive <sup>f</sup> |
| "           | <i>Df(3L)XG3</i>    | +<br>Ubx | red<br>w5             | +<br>Ubx | ND<br>ND | Negative                                      |

<sup>a</sup>  $y w^{67c23}; Df(2L)M26; P\{w^+\}39C-62$  females were crossed to  $y w^{67c23}; mutant/SM1, Cy$  or  $y w^{67c23}; mutant/TM6, Ubx$ . F<sub>1</sub> males were aged for three days, then examined for eye color. Males without the balancer constitute the test for suppressors of the Su(TPE) activity of M26 on the C62 telomeric insert. Males with the balancer act as a sibling control.

<sup>b</sup>  $y w^{67c23}; P\{w^+\}39C-62$  females were crossed to  $y w^{67c23}; mutant/SM1, Cy$  or  $y w^{67c23}; mutant/TM6, Ubx$ . F<sub>1</sub> males were aged for three days, then examined for eye color. Males without the balancer constitute the test for suppressors of the Su(TPE) activity of M26 on the C62 telomeric insert. Males with the balancer act as a sibling control.

<sup>c</sup> Oregon R was a negative control.

<sup>d</sup> ND indicates not done.

<sup>e</sup> Mutant is a dominant suppressor of TPE at C62, in 3R TAS, but not at 11-5, in 2LTAS. *Df(3R)04661* removes part of 3R TAS. Deficiencies for 3R TAS are known to be dominant suppressors of TPE at the 3R telomere (Laurenti et al, 1995). The apparent enhancement of the suppression caused by M26 is likely due to a combination of suppression due to M26 with suppression due to the *mod* mutant.

<sup>f</sup> The *Df(3L)fz-M21* chromosome carries a suppressor of the M26 suppressor, but the *Df(3L)XG3* chromosome does not. The simplest explanation is that the observed effect is due to a genetic factor at an unrelated site.

### Chromosome 3R TAS repeat unit

GTGAGGTCCGATCGGGTTGTCAAGAAGGCACGAACAGCCTCAGCAGCTAAGTGAGGTCCGATTGGGTTGTCAAGAA  
AGTGTGTTAGAGGGAGATGCAATGTAGTGAACGCCAGTGTGTATAGATATTAGAGAATATGTAGAAGAAGGGAAAT  
GTAAGAAGATTCCTTCAGGTGAGGTCCGATCGGGTTGTCAAGAAGGCACGAACAACCTCTGCAGCTGCGTGAGGTCC  
GATCGGGTTGTCAAGAA TAGTGTGTTAGAGGGAGATGAAAATCTGTGCGAGCGCTGCGGCAGAGGCACGAACAACCT  
CTGCAGCTGCGTGAGGTCCGATCGGGTTGTCAAGAA TAGTGTGTTAGAGGGAGATGAAAATGTAGTGAACGCCAGTG  
TGTATAGATATTAGAGAATATGTTGAAGAAGGGAAATGTAAGAAGATCCCTTCAGTCAAGTTTACTGGTTCGTGTTG  
ATCGGTAATGCTGCGCCGCCACCAATAATAAACTGAATAAAGGAAATGGATGAGACACTAACTTATTAATAAT  
ATATTAATTAACAATATTAATAATCGTTTTGTTCTTGCCGGTGTATAAAAGAAATTATATTTTTAAACATTATCCT  
TCTGGAAATCTTTTTTCAATTTTTATCGAATATAATCTTACAAAAGCAACTAACAAAATTAATCTAAAAATTTTC  
GTATATTAATTAAGTGACGATTAATACGAAACTTACAAACAAATTATTGAAGTATTTGTTAGTTCGAAATTATAC  
TAAAAATGTTTATACATCTTAAAAAGATATTTGATTATTATTATATTATTTTTTGCATAAAAAATATACATT  
TTTAATGTTCTCTGTTTTTGGTGTAAAAGCATTGCAAAAATATAACGACGCGTACACATATGTGCGAGCGTGACTGT  
TCGCATTCTAGGAATTCCTTCTGTTATTTAACATTCTTATAAAATAGTAATATTGCGG

### Chromosome 2L TAS repeat unit

ATCGACAATGCACGACAGAGGAAGCAGAACAGATATTTAGATTG CCTCTCATTCTCTCCCATATTATA  
GGGAGAAATATGATCGCGTATGCGAGAGTAGTGCCAACATATTGTGCTCTTTGATTTTTTGGCAACCCAA  
AATGGTGGCGGATGAACGAGATGATAATATATTCAAGTTGCCGCTAATCAGAAATAAATTCATTGCAACG  
TTAAATACAGCACAATATATGATCGCGTATGCGAGAGTAGTGCCAACATATTGTGCTAATGAGTGCCTCT  
CGTTCTCTGTCTTATATTACCGCAAACCCAAAAGACAATACACGACAGAGAGAGAGAGCAGCGGAGATA  
TTTAGATTGCCTATTAAATATGATCGCGTATGCGAGAGTAGTGCCAACATATTGTGCTCTCTATATAATG  
ACTGCCTCTCATTCTGTCTTATTTTACCGCAAACCCAA

**Figure S1:** DNA sequence of a TAS-R repeat unit from Chromosome 3R and a TAS-L repeat unit from Chromosomes 2L and 3L. Capture probe hybridization sequences are highlighted in yellow and single mismatch in red.



## SUPPLEMENTARY REFERENCES

- S1. **Berriz, G. F., J. E. Beaver, C. Cenik, M. Tasan, and F. P. Roth.** 2009. Next generation software for functional trend analysis. *Bioinformatics* **25**:3043-3044.
- S2. **Laurenti, P., Y. Graba, R. Rosset, and J. Pradel.** 1995. Genetic and molecular analysis of terminal deletions of chromosome 3R of *Drosophila melanogaster*. *Gene* **154**:177-181.
